# Supplementary material
Source: publisher figshare collection journal article supplement (https://gsajournals.figshare.com/ndownloader/files/40289890)
Supplement: Supplementary file 1 [file 40289890]

## Sheet: HPL-1 Intestine
I	23003	23092	.	0	+
I	149403	149741	.	0	+
I	230050	231298	.	0	+
I	266045	266385	.	0	+
I	341367	341964	.	0	+
I	359843	360738	.	0	+
I	366694	366997	.	0	+
I	439127	439988	.	0	+
I	448174	449579	.	0	+
I	457660	457905	.	0	+
I	464046	464520	.	0	+
I	527540	528192	.	0	+
I	529330	529732	.	0	+
I	529866	530893	.	0	+
I	532142	532782	.	0	+
I	576741	577250	.	0	+
I	664619	664791	.	0	+
I	702779	702937	.	0	+
I	735985	736804	.	0	+
I	737615	738530	.	0	+
I	756207	756726	.	0	+
I	765339	766048	.	0	+
I	795356	796255	.	0	+
I	825468	826682	.	0	+
I	838305	840022	.	0	+
I	840037	841085	.	0	+
I	861423	861839	.	0	+
I	889955	890564	.	0	+
I	909091	910916	.	0	+
I	911068	911339	.	0	+
I	948144	948790	.	0	+
I	990655	990782	.	0	+
I	1133163	1133946	.	0	+
I	1217231	1218820	.	0	+
I	1218944	1219605	.	0	+
I	1255705	1257271	.	0	+
I	1452566	1453194	.	0	+
I	1668848	1670103	.	0	+
I	1673639	1673917	.	0	+
I	1781195	1781496	.	0	+
I	1792385	1792747	.	0	+
I	1812961	1813264	.	0	+
I	2048798	2050138	.	0	+
I	2057124	2057841	.	0	+
I	2058532	2059419	.	0	+
I	2071662	2072218	.	0	+
I	2237977	2238509	.	0	+
I	2318693	2319906	.	0	+
I	2326098	2326935	.	0	+
I	2488143	2488303	.	0	+
I	2601242	2601672	.	0	+
I	2602056	2602124	.	0	+
I	2736055	2736228	.	0	+
I	2887847	2888301	.	0	+
I	2945396	2945986	.	0	+
I	3011077	3011553	.	0	+
I	3152241	3152350	.	0	+
I	3355430	3355830	.	0	+
I	3355946	3356435	.	0	+
I	3368052	3368519	.	0	+
I	3373042	3373430	.	0	+
I	3401981	3402700	.	0	+
I	3455140	3455679	.	0	+
I	3488327	3488924	.	0	+
I	3569989	3570361	.	0	+
I	3630302	3631382	.	0	+
I	3693838	3693957	.	0	+
I	3754084	3755024	.	0	+
I	3828343	3829070	.	0	+
I	3898525	3899140	.	0	+
I	3940250	3941303	.	0	+
I	3945038	3945436	.	0	+
I	3975990	3976758	.	0	+
I	4003653	4003955	.	0	+
I	4066858	4067348	.	0	+
I	4128887	4129514	.	0	+
I	4217913	4218580	.	0	+
I	4230494	4231307	.	0	+
I	4237095	4237585	.	0	+
I	4304541	4305050	.	0	+
I	4305542	4305917	.	0	+
I	4461257	4461662	.	0	+
I	4748776	4749303	.	0	+
I	4757542	4757610	.	0	+
I	4935762	4936561	.	0	+
I	4974460	4975010	.	0	+
I	5007093	5007484	.	0	+
I	5047005	5047387	.	0	+
I	5083056	5083660	.	0	+
I	5168604	5169121	.	0	+
I	5208115	5209789	.	0	+
I	5216958	5217632	.	0	+
I	5233284	5233653	.	0	+
I	5271459	5272165	.	0	+
I	5330793	5331650	.	0	+
I	5515368	5515977	.	0	+
I	5660500	5660677	.	0	+
I	5977411	5977856	.	0	+
I	6336575	6337651	.	0	+
I	6372437	6373053	.	0	+
I	6547858	6548582	.	0	+
I	6660603	6661999	.	0	+
I	6728015	6728517	.	0	+
I	6798023	6798372	.	0	+
I	6875052	6875468	.	0	+
I	6883088	6884614	.	0	+
I	6886195	6886982	.	0	+
I	7236497	7236887	.	0	+
I	7244129	7245105	.	0	+
I	7504764	7504852	.	0	+
I	7612610	7613288	.	0	+
I	7626691	7627974	.	0	+
I	7631182	7631743	.	0	+
I	7633610	7634055	.	0	+
I	7947960	7948690	.	0	+
I	8052407	8052627	.	0	+
I	8125867	8126799	.	0	+
I	8332319	8332717	.	0	+
I	8386522	8386928	.	0	+
I	8411813	8412888	.	0	+
I	8430112	8430606	.	0	+
I	8452270	8452836	.	0	+
I	8454145	8454798	.	0	+
I	8574328	8574936	.	0	+
I	8757594	8759774	.	0	+
I	8865360	8865705	.	0	+
I	8975651	8976387	.	0	+
I	8976492	8978924	.	0	+
I	8984515	8986301	.	0	+
I	8999510	8999856	.	0	+
I	9005699	9006418	.	0	+
I	9095016	9095911	.	0	+
I	9375405	9376502	.	0	+
I	9448824	9449826	.	0	+
I	9657491	9657823	.	0	+
I	9874927	9875253	.	0	+
I	10018384	10019324	.	0	+
I	10120175	10120777	.	0	+
I	10237587	10238105	.	0	+
I	10281644	10282609	.	0	+
I	10524709	10525155	.	0	+
I	10543378	10543649	.	0	+
I	10754328	10754759	.	0	+
I	10818314	10818782	.	0	+
I	10882024	10882657	.	0	+
I	11024427	11026162	.	0	+
I	11064250	11064886	.	0	+
I	11117720	11117771	.	0	+
I	11148858	11150677	.	0	+
I	11153940	11154424	.	0	+
I	11184920	11186003	.	0	+
I	11255206	11255779	.	0	+
I	11306978	11307720	.	0	+
I	11361711	11361783	.	0	+
I	11443201	11443628	.	0	+
I	11444142	11444379	.	0	+
I	11494590	11495072	.	0	+
I	11543838	11544862	.	0	+
I	11560042	11561279	.	0	+
I	11660523	11660987	.	0	+
I	11766390	11766633	.	0	+
I	11768416	11768845	.	0	+
I	11769129	11769634	.	0	+
I	11770162	11770478	.	0	+
I	11877680	11878381	.	0	+
I	12104648	12105203	.	0	+
I	12113687	12113917	.	0	+
I	12168473	12169247	.	0	+
I	12196861	12197406	.	0	+
I	12219992	12220765	.	0	+
I	12244453	12244735	.	0	+
I	12249026	12249912	.	0	+
I	12298677	12299308	.	0	+
I	12306083	12306531	.	0	+
I	12351766	12352383	.	0	+
I	12383721	12384266	.	0	+
I	12408272	12409177	.	0	+
I	12453308	12453996	.	0	+
I	12470914	12471617	.	0	+
I	12472466	12472996	.	0	+
I	12499648	12500656	.	0	+
I	12506180	12506292	.	0	+
I	12591245	12592196	.	0	+
I	12622577	12623394	.	0	+
I	12680293	12680748	.	0	+
I	12683996	12684347	.	0	+
I	12707555	12708143	.	0	+
I	12723429	12724054	.	0	+
I	12815662	12816047	.	0	+
I	13010701	13011258	.	0	+
I	13013515	13013895	.	0	+
I	13068119	13069405	.	0	+
I	13084160	13084543	.	0	+
I	13204314	13205168	.	0	+
I	13207198	13207792	.	0	+
I	13228791	13228854	.	0	+
I	13239243	13240262	.	0	+
I	13256026	13256545	.	0	+
I	13259702	13260130	.	0	+
I	13299760	13300544	.	0	+
I	13312509	13313093	.	0	+
I	13409171	13409828	.	0	+
I	13745658	13746215	.	0	+
I	13844292	13844690	.	0	+
I	13904875	13906277	.	0	+
I	13910247	13911450	.	0	+
I	13912257	13912741	.	0	+
I	13923000	13923157	.	0	+
I	13953993	13955384	.	0	+
I	13962916	13963437	.	0	+
I	13991060	13992179	.	0	+
I	14091363	14091430	.	0	+
I	14187789	14188225	.	0	+
I	14188342	14188481	.	0	+
I	14206966	14207542	.	0	+
I	14246015	14246612	.	0	+
I	14247132	14247711	.	0	+
I	14247739	14248297	.	0	+
I	14288165	14288751	.	0	+
I	14331821	14332485	.	0	+
I	14384171	14385134	.	0	+
I	14396861	14397949	.	0	+
I	14444982	14445495	.	0	+
I	14520185	14520958	.	0	+
I	14830292	14831903	.	0	+
I	14846969	14847479	.	0	+
I	14856281	14857498	.	0	+
I	14857614	14857761	.	0	+
I	14858010	14860156	.	0	+
I	14860926	14862854	.	0	+
I	14882485	14882702	.	0	+
I	14883626	14883947	.	0	+
I	14889885	14890308	.	0	+
I	14892470	14893766	.	0	+
I	14909355	14910667	.	0	+
I	14981809	14982293	.	0	+
I	14994902	14995378	.	0	+
I	14996317	14998178	.	0	+
II	373860	374611	.	0	+
II	427659	428409	.	0	+
II	436738	437346	.	0	+
II	541005	541416	.	0	+
II	582912	583544	.	0	+
II	589103	589848	.	0	+
II	627199	627940	.	0	+
II	668179	668285	.	0	+
II	813473	813741	.	0	+
II	829681	830363	.	0	+
II	845828	846267	.	0	+
II	869847	870138	.	0	+
II	922171	922564	.	0	+
II	1023578	1024548	.	0	+
II	1059944	1060117	.	0	+
II	1089957	1090876	.	0	+
II	1256844	1257744	.	0	+
II	1398992	1399736	.	0	+
II	1489183	1489868	.	0	+
II	1604268	1604693	.	0	+
II	1644164	1645959	.	0	+
II	1646022	1646815	.	0	+
II	1675582	1675658	.	0	+
II	1681198	1681696	.	0	+
II	1691687	1692660	.	0	+
II	1705216	1705890	.	0	+
II	1709664	1710990	.	0	+
II	1723827	1724282	.	0	+
II	1725987	1726318	.	0	+
II	1760457	1760775	.	0	+
II	1780186	1780802	.	0	+
II	1805233	1805741	.	0	+
II	1805912	1807186	.	0	+
II	1851925	1852340	.	0	+
II	1876295	1876732	.	0	+
II	1929349	1930036	.	0	+
II	1930040	1930442	.	0	+
II	1931592	1932951	.	0	+
II	1948912	1949751	.	0	+
II	1952638	1953728	.	0	+
II	2021744	2022461	.	0	+
II	2026186	2026858	.	0	+
II	2034463	2035196	.	0	+
II	2052438	2053217	.	0	+
II	2073866	2075209	.	0	+
II	2127355	2128257	.	0	+
II	2138323	2139348	.	0	+
II	2163307	2164138	.	0	+
II	2167899	2168381	.	0	+
II	2215406	2215934	.	0	+
II	2216838	2217370	.	0	+
II	2220734	2220913	.	0	+
II	2220996	2221133	.	0	+
II	2258910	2259426	.	0	+
II	2273156	2273367	.	0	+
II	2274991	2275589	.	0	+
II	2288893	2290101	.	0	+
II	2294991	2295436	.	0	+
II	2394738	2395445	.	0	+
II	2552599	2554551	.	0	+
II	2555883	2556904	.	0	+
II	2559512	2560021	.	0	+
II	2562342	2563100	.	0	+
II	2600738	2601251	.	0	+
II	2602696	2603074	.	0	+
II	2662704	2663395	.	0	+
II	2686579	2687512	.	0	+
II	2716213	2718958	.	0	+
II	2741283	2742208	.	0	+
II	2786170	2786747	.	0	+
II	2836064	2836772	.	0	+
II	2840971	2841717	.	0	+
II	2847300	2848450	.	0	+
II	2849065	2849825	.	0	+
II	2864787	2865814	.	0	+
II	2903524	2904117	.	0	+
II	2925502	2925833	.	0	+
II	2988465	2988507	.	0	+
II	2999573	3000623	.	0	+
II	3004809	3006049	.	0	+
II	3051368	3052715	.	0	+
II	3053620	3054427	.	0	+
II	3054501	3056118	.	0	+
II	3109552	3109836	.	0	+
II	3121598	3122054	.	0	+
II	3152424	3153333	.	0	+
II	3173213	3173912	.	0	+
II	3175117	3175471	.	0	+
II	3182171	3182352	.	0	+
II	3194331	3194832	.	0	+
II	3279963	3280111	.	0	+
II	3300884	3301865	.	0	+
II	3352300	3353251	.	0	+
II	3382166	3382644	.	0	+
II	3388579	3389011	.	0	+
II	3432669	3433182	.	0	+
II	3457454	3457862	.	0	+
II	3468924	3469715	.	0	+
II	3519697	3520669	.	0	+
II	3525107	3525717	.	0	+
II	3574739	3575425	.	0	+
II	3578794	3579660	.	0	+
II	3613394	3613797	.	0	+
II	3626553	3627375	.	0	+
II	3632898	3633038	.	0	+
II	3770920	3771490	.	0	+
II	3797569	3799458	.	0	+
II	3830034	3830729	.	0	+
II	3874372	3874732	.	0	+
II	3967833	3968369	.	0	+
II	4054609	4055666	.	0	+
II	4144919	4145451	.	0	+
II	4219384	4219742	.	0	+
II	4521408	4522019	.	0	+
II	4524166	4525285	.	0	+
II	4609451	4609570	.	0	+
II	4743202	4743586	.	0	+
II	4821521	4822232	.	0	+
II	4920392	4921346	.	0	+
II	5006225	5006702	.	0	+
II	5086143	5086460	.	0	+
II	5342376	5342792	.	0	+
II	5458373	5458960	.	0	+
II	5575193	5575570	.	0	+
II	5768539	5769234	.	0	+
II	5800240	5800832	.	0	+
II	5874380	5875032	.	0	+
II	5935174	5935603	.	0	+
II	6084878	6085132	.	0	+
II	6130734	6131166	.	0	+
II	6338603	6339402	.	0	+
II	6358790	6359620	.	0	+
II	6393208	6394424	.	0	+
II	6442311	6442767	.	0	+
II	6448393	6449430	.	0	+
II	6481889	6482791	.	0	+
II	6500512	6501220	.	0	+
II	6819519	6819916	.	0	+
II	6986373	6987003	.	0	+
II	7023299	7024028	.	0	+
II	7068319	7068859	.	0	+
II	7227393	7228674	.	0	+
II	7295047	7295477	.	0	+
II	7368393	7368436	.	0	+
II	7406540	7407142	.	0	+
II	7413064	7413680	.	0	+
II	7446836	7446990	.	0	+
II	7447194	7447334	.	0	+
II	7447661	7447815	.	0	+
II	7448005	7448145	.	0	+
II	7456293	7456599	.	0	+
II	7530675	7531264	.	0	+
II	7531609	7532319	.	0	+
II	7588023	7588730	.	0	+
II	7678085	7679248	.	0	+
II	8010472	8010914	.	0	+
II	8078687	8079271	.	0	+
II	8183988	8184956	.	0	+
II	8201846	8202442	.	0	+
II	8226129	8226966	.	0	+
II	8338985	8340497	.	0	+
II	8345825	8346521	.	0	+
II	8393216	8393313	.	0	+
II	8418509	8421925	.	0	+
II	8440259	8441016	.	0	+
II	8487967	8488555	.	0	+
II	8659889	8660263	.	0	+
II	8844636	8844988	.	0	+
II	8873767	8874190	.	0	+
II	8944072	8944943	.	0	+
II	8956588	8957036	.	0	+
II	9038124	9039107	.	0	+
II	9044950	9045047	.	0	+
II	9046980	9047780	.	0	+
II	9369192	9369793	.	0	+
II	9596440	9596967	.	0	+
II	9651660	9652460	.	0	+
II	9879873	9880344	.	0	+
II	10010100	10010570	.	0	+
II	10018144	10018834	.	0	+
II	10045542	10046272	.	0	+
II	10209666	10209800	.	0	+
II	10289049	10289745	.	0	+
II	10548746	10548839	.	0	+
II	10703018	10704049	.	0	+
II	10706877	10708612	.	0	+
II	10779188	10779251	.	0	+
II	10934338	10935880	.	0	+
II	10938982	10939328	.	0	+
II	10940468	10941023	.	0	+
II	11003342	11004863	.	0	+
II	11056675	11057372	.	0	+
II	11178495	11178995	.	0	+
II	11211529	11212548	.	0	+
II	11242569	11242657	.	0	+
II	11434428	11434881	.	0	+
II	11488116	11488719	.	0	+
II	11579177	11579298	.	0	+
II	11590724	11590890	.	0	+
II	11710651	11711075	.	0	+
II	11791519	11792198	.	0	+
II	11844904	11845275	.	0	+
II	11850263	11850767	.	0	+
II	12212120	12212295	.	0	+
II	12223368	12223939	.	0	+
II	12262618	12263231	.	0	+
II	12263922	12264238	.	0	+
II	12368861	12369777	.	0	+
II	12455494	12456239	.	0	+
II	12606389	12607003	.	0	+
II	12607279	12608364	.	0	+
II	12622960	12623860	.	0	+
II	12633003	12633243	.	0	+
II	12715587	12716448	.	0	+
II	13002562	13003419	.	0	+
II	13170572	13171165	.	0	+
II	13254278	13254832	.	0	+
II	13257836	13258383	.	0	+
II	13525831	13526167	.	0	+
II	13529043	13529636	.	0	+
II	13560786	13560966	.	0	+
II	13600133	13600794	.	0	+
II	13648400	13649071	.	0	+
II	13737772	13738232	.	0	+
II	13917416	13918040	.	0	+
II	13961031	13961614	.	0	+
II	14091533	14092305	.	0	+
II	14111485	14112258	.	0	+
II	14166499	14167468	.	0	+
II	14206999	14207426	.	0	+
II	14318013	14319217	.	0	+
II	14319615	14319763	.	0	+
II	14322610	14323074	.	0	+
II	14351236	14351406	.	0	+
II	14356914	14357051	.	0	+
II	14382011	14382141	.	0	+
II	14521475	14522484	.	0	+
II	14657758	14657898	.	0	+
II	14661437	14662069	.	0	+
II	14663809	14665020	.	0	+
II	15002695	15003289	.	0	+
II	15118509	15119400	.	0	+
II	15152678	15153827	.	0	+
III	63502	64367	.	0	+
III	65562	66061	.	0	+
III	165402	165763	.	0	+
III	174650	175857	.	0	+
III	177032	177521	.	0	+
III	352388	353505	.	0	+
III	355883	356167	.	0	+
III	368453	369208	.	0	+
III	373150	373582	.	0	+
III	384912	385616	.	0	+
III	505745	507339	.	0	+
III	665883	666807	.	0	+
III	735015	735821	.	0	+
III	738779	738920	.	0	+
III	740435	741272	.	0	+
III	761814	762281	.	0	+
III	818349	819107	.	0	+
III	823280	824231	.	0	+
III	898326	898944	.	0	+
III	946309	947234	.	0	+
III	964978	966275	.	0	+
III	966713	967419	.	0	+
III	976720	977388	.	0	+
III	1051858	1052497	.	0	+
III	1171523	1171849	.	0	+
III	1345868	1346391	.	0	+
III	1361502	1362489	.	0	+
III	1377004	1377920	.	0	+
III	1707548	1708610	.	0	+
III	1719492	1719988	.	0	+
III	1804632	1805614	.	0	+
III	1916621	1917145	.	0	+
III	1966964	1967451	.	0	+
III	1971312	1971979	.	0	+
III	1973385	1973783	.	0	+
III	1974825	1977476	.	0	+
III	2011623	2011934	.	0	+
III	2121623	2122006	.	0	+
III	2465956	2466739	.	0	+
III	2563200	2563767	.	0	+
III	2669851	2670200	.	0	+
III	2671004	2671386	.	0	+
III	2672346	2672814	.	0	+
III	2673261	2673689	.	0	+
III	2927777	2928126	.	0	+
III	2930186	2931185	.	0	+
III	2932177	2932620	.	0	+
III	2939777	2940180	.	0	+
III	2940320	2940692	.	0	+
III	3054770	3056062	.	0	+
III	3165130	3165994	.	0	+
III	3273350	3273924	.	0	+
III	3276950	3277376	.	0	+
III	3379011	3379411	.	0	+
III	3438378	3438893	.	0	+
III	3446154	3447825	.	0	+
III	3623900	3624265	.	0	+
III	3929616	3930343	.	0	+
III	4236182	4237078	.	0	+
III	4351504	4351873	.	0	+
III	4417577	4417990	.	0	+
III	4525766	4525874	.	0	+
III	4533907	4534148	.	0	+
III	4703429	4703957	.	0	+
III	4729576	4730413	.	0	+
III	5143527	5144243	.	0	+
III	5270799	5271325	.	0	+
III	5619679	5620323	.	0	+
III	5762753	5763472	.	0	+
III	5775224	5775650	.	0	+
III	5776691	5777373	.	0	+
III	5887958	5888640	.	0	+
III	6048773	6049087	.	0	+
III	6105675	6106457	.	0	+
III	6243157	6243310	.	0	+
III	6438671	6439049	.	0	+
III	6533671	6534068	.	0	+
III	6648404	6649207	.	0	+
III	6717848	6718410	.	0	+
III	6792267	6792757	.	0	+
III	6840740	6841011	.	0	+
III	6947914	6948590	.	0	+
III	6976800	6977720	.	0	+
III	6978430	6979715	.	0	+
III	7026528	7026652	.	0	+
III	7212957	7213470	.	0	+
III	7314320	7314684	.	0	+
III	7482260	7485188	.	0	+
III	7488333	7489067	.	0	+
III	7490443	7490803	.	0	+
III	7511891	7512371	.	0	+
III	7630274	7630770	.	0	+
III	7968367	7968860	.	0	+
III	7985726	7986232	.	0	+
III	7987985	7988067	.	0	+
III	8048104	8048324	.	0	+
III	8077483	8078366	.	0	+
III	8192155	8192648	.	0	+
III	8206677	8207289	.	0	+
III	8262090	8262483	.	0	+
III	8262650	8264343	.	0	+
III	8296098	8296620	.	0	+
III	8597743	8598160	.	0	+
III	8658485	8658899	.	0	+
III	8729819	8729912	.	0	+
III	8801467	8801858	.	0	+
III	8863763	8863902	.	0	+
III	8866178	8866800	.	0	+
III	9064424	9064943	.	0	+
III	9459207	9459312	.	0	+
III	9682776	9682924	.	0	+
III	9849817	9850433	.	0	+
III	9945411	9946018	.	0	+
III	9948930	9949613	.	0	+
III	10172770	10173308	.	0	+
III	10174553	10175037	.	0	+
III	10179739	10180397	.	0	+
III	10240037	10240845	.	0	+
III	10259833	10260248	.	0	+
III	10294190	10294866	.	0	+
III	10328116	10328863	.	0	+
III	10384706	10385205	.	0	+
III	10459290	10459343	.	0	+
III	10510978	10511275	.	0	+
III	10525963	10527214	.	0	+
III	10752821	10754700	.	0	+
III	10866453	10866676	.	0	+
III	10979273	10979878	.	0	+
III	10987573	10988726	.	0	+
III	11418448	11419100	.	0	+
III	11476593	11477071	.	0	+
III	11498950	11499394	.	0	+
III	11510906	11511340	.	0	+
III	11583026	11583856	.	0	+
III	11610526	11611805	.	0	+
III	11730806	11731195	.	0	+
III	11732474	11732732	.	0	+
III	11743339	11743827	.	0	+
III	11929614	11930065	.	0	+
III	12206485	12206545	.	0	+
III	12245588	12248182	.	0	+
III	12335485	12335535	.	0	+
III	12391331	12393521	.	0	+
III	12490149	12491032	.	0	+
III	12747225	12747611	.	0	+
III	12788243	12788736	.	0	+
III	12943856	12944188	.	0	+
III	12986690	12987387	.	0	+
III	13053348	13054041	.	0	+
III	13131245	13131988	.	0	+
III	13230836	13231672	.	0	+
III	13242010	13243258	.	0	+
III	13518433	13518911	.	0	+
III	13553044	13553209	.	0	+
III	13561651	13562615	.	0	+
III	13651362	13651622	.	0	+
III	13656010	13656916	.	0	+
III	13780312	13781199	.	0	+
IV	115710	116564	.	0	+
IV	140656	141185	.	0	+
IV	383841	384261	.	0	+
IV	506236	506559	.	0	+
IV	604679	605324	.	0	+
IV	698173	698748	.	0	+
IV	762814	763076	.	0	+
IV	857036	857336	.	0	+
IV	913651	914668	.	0	+
IV	917749	918680	.	0	+
IV	957534	958204	.	0	+
IV	1103789	1104913	.	0	+
IV	1119523	1123220	.	0	+
IV	1431827	1433172	.	0	+
IV	1444654	1445922	.	0	+
IV	1512985	1514442	.	0	+
IV	1536703	1537211	.	0	+
IV	1718565	1719838	.	0	+
IV	1720515	1721728	.	0	+
IV	1868667	1869435	.	0	+
IV	1881861	1882387	.	0	+
IV	1916249	1916629	.	0	+
IV	1971481	1971589	.	0	+
IV	1978898	1979863	.	0	+
IV	1990608	1991194	.	0	+
IV	2085117	2085527	.	0	+
IV	2089810	2090463	.	0	+
IV	2236455	2238203	.	0	+
IV	2434870	2435371	.	0	+
IV	2491062	2491822	.	0	+
IV	2729260	2731239	.	0	+
IV	2888563	2888838	.	0	+
IV	2995089	2995750	.	0	+
IV	3082608	3083218	.	0	+
IV	3100879	3101451	.	0	+
IV	3255181	3255407	.	0	+
IV	3287703	3288546	.	0	+
IV	3367135	3367424	.	0	+
IV	3437822	3438359	.	0	+
IV	3797266	3797856	.	0	+
IV	3890812	3891243	.	0	+
IV	3930000	3930732	.	0	+
IV	3953872	3955439	.	0	+
IV	3971208	3972241	.	0	+
IV	4003198	4003778	.	0	+
IV	4008544	4009536	.	0	+
IV	4009661	4010459	.	0	+
IV	4018819	4019451	.	0	+
IV	4040936	4042103	.	0	+
IV	4168574	4169002	.	0	+
IV	4301029	4301819	.	0	+
IV	4339808	4340149	.	0	+
IV	4381566	4381656	.	0	+
IV	4516328	4517359	.	0	+
IV	4648437	4648526	.	0	+
IV	4671707	4672105	.	0	+
IV	4737383	4738142	.	0	+
IV	4769654	4769846	.	0	+
IV	5457979	5458795	.	0	+
IV	5685819	5686200	.	0	+
IV	5686372	5687529	.	0	+
IV	5813547	5813954	.	0	+
IV	5991554	5992014	.	0	+
IV	5993393	5993715	.	0	+
IV	5995145	5996373	.	0	+
IV	5996590	5997106	.	0	+
IV	5997995	5998878	.	0	+
IV	6002769	6003066	.	0	+
IV	6007260	6008656	.	0	+
IV	6249700	6250241	.	0	+
IV	6311160	6311658	.	0	+
IV	6345958	6347153	.	0	+
IV	6357066	6357474	.	0	+
IV	6797454	6797839	.	0	+
IV	6823994	6824462	.	0	+
IV	6947209	6947696	.	0	+
IV	7151916	7152702	.	0	+
IV	7155709	7156154	.	0	+
IV	7209709	7209849	.	0	+
IV	7406355	7406953	.	0	+
IV	7411401	7411799	.	0	+
IV	7414519	7415152	.	0	+
IV	7475375	7475893	.	0	+
IV	7480750	7481136	.	0	+
IV	7484064	7485374	.	0	+
IV	7515585	7515941	.	0	+
IV	7647122	7647617	.	0	+
IV	7727364	7727653	.	0	+
IV	7763475	7763993	.	0	+
IV	8025590	8026060	.	0	+
IV	8067568	8068193	.	0	+
IV	8084124	8084654	.	0	+
IV	8175765	8176081	.	0	+
IV	8211452	8211819	.	0	+
IV	8294201	8294952	.	0	+
IV	8305519	8306195	.	0	+
IV	8312602	8314243	.	0	+
IV	8316739	8317557	.	0	+
IV	8462646	8463501	.	0	+
IV	8472526	8473477	.	0	+
IV	8495766	8496315	.	0	+
IV	8503279	8504158	.	0	+
IV	8592514	8593017	.	0	+
IV	8759424	8759842	.	0	+
IV	8816884	8817158	.	0	+
IV	8817464	8818980	.	0	+
IV	8824267	8824818	.	0	+
IV	8978420	8978793	.	0	+
IV	8982954	8983527	.	0	+
IV	9076662	9077610	.	0	+
IV	9232412	9233090	.	0	+
IV	9757397	9757743	.	0	+
IV	10198547	10200115	.	0	+
IV	10606159	10606864	.	0	+
IV	10617573	10618292	.	0	+
IV	10623490	10624024	.	0	+
IV	10781575	10782789	.	0	+
IV	10803580	10804286	.	0	+
IV	11410293	11410809	.	0	+
IV	11441337	11442446	.	0	+
IV	11576157	11576457	.	0	+
IV	11583229	11584784	.	0	+
IV	11749462	11750232	.	0	+
IV	11815273	11815789	.	0	+
IV	11819301	11820017	.	0	+
IV	11845218	11846196	.	0	+
IV	11886490	11886981	.	0	+
IV	11977300	11978139	.	0	+
IV	11979520	11979824	.	0	+
IV	11980882	11980980	.	0	+
IV	11982006	11983141	.	0	+
IV	11986382	11987161	.	0	+
IV	12055314	12056386	.	0	+
IV	12453821	12454024	.	0	+
IV	13088614	13088981	.	0	+
IV	13236241	13236554	.	0	+
IV	13239677	13239713	.	0	+
IV	13350683	13351356	.	0	+
IV	13357217	13357534	.	0	+
IV	13432948	13434577	.	0	+
IV	14216643	14217756	.	0	+
IV	14335260	14335638	.	0	+
IV	14537244	14538089	.	0	+
IV	14610361	14610863	.	0	+
IV	14806087	14807336	.	0	+
IV	15521949	15522269	.	0	+
IV	15823950	15824797	.	0	+
IV	15938607	15939206	.	0	+
IV	15943481	15943979	.	0	+
IV	16159430	16160163	.	0	+
IV	16312115	16312809	.	0	+
IV	16314056	16315124	.	0	+
IV	16316627	16318773	.	0	+
IV	16328648	16329262	.	0	+
IV	16354236	16354765	.	0	+
IV	16469670	16470347	.	0	+
IV	16494393	16495028	.	0	+
IV	16776858	16777261	.	0	+
IV	16840576	16841391	.	0	+
IV	16867657	16868427	.	0	+
IV	16962302	16962809	.	0	+
IV	17402104	17402379	.	0	+
V	42110	44163	.	0	+
V	67910	68443	.	0	+
V	194614	194837	.	0	+
V	298182	299268	.	0	+
V	328580	328893	.	0	+
V	345746	346151	.	0	+
V	377473	378501	.	0	+
V	570182	571137	.	0	+
V	579698	580294	.	0	+
V	599722	600198	.	0	+
V	600532	601066	.	0	+
V	668022	669662	.	0	+
V	699707	700472	.	0	+
V	793121	795862	.	0	+
V	799950	800560	.	0	+
V	1174804	1175246	.	0	+
V	1205184	1205648	.	0	+
V	1368072	1369528	.	0	+
V	1520727	1521171	.	0	+
V	1588507	1589087	.	0	+
V	1593898	1594714	.	0	+
V	1698003	1699677	.	0	+
V	2180113	2180516	.	0	+
V	2344678	2345996	.	0	+
V	2668653	2668720	.	0	+
V	2684143	2684445	.	0	+
V	2784468	2784923	.	0	+
V	2796848	2797681	.	0	+
V	2799131	2800516	.	0	+
V	2857279	2857785	.	0	+
V	3131654	3132099	.	0	+
V	3134761	3136015	.	0	+
V	3165765	3166331	.	0	+
V	3273380	3273940	.	0	+
V	3284964	3285565	.	0	+
V	3289359	3290044	.	0	+
V	3352820	3353806	.	0	+
V	3382434	3382815	.	0	+
V	3411759	3412318	.	0	+
V	3443044	3443229	.	0	+
V	3443295	3443970	.	0	+
V	3593623	3593933	.	0	+
V	3685954	3686520	.	0	+
V	3771654	3772183	.	0	+
V	3811088	3811837	.	0	+
V	3845402	3845721	.	0	+
V	3946336	3946818	.	0	+
V	3979984	3981545	.	0	+
V	4058516	4059062	.	0	+
V	4104930	4105244	.	0	+
V	4119729	4120280	.	0	+
V	4179915	4180061	.	0	+
V	4284539	4285221	.	0	+
V	4302935	4304813	.	0	+
V	4304928	4307301	.	0	+
V	4307919	4308596	.	0	+
V	4375227	4376150	.	0	+
V	4412806	4413238	.	0	+
V	4557487	4558057	.	0	+
V	4580237	4581346	.	0	+
V	4754617	4755627	.	0	+
V	4758304	4758401	.	0	+
V	4901919	4902509	.	0	+
V	5181410	5183289	.	0	+
V	5188589	5189588	.	0	+
V	5295837	5296386	.	0	+
V	5299305	5299974	.	0	+
V	5410378	5410981	.	0	+
V	5693542	5694237	.	0	+
V	5697602	5698253	.	0	+
V	5700843	5701452	.	0	+
V	5743969	5744397	.	0	+
V	5913874	5914574	.	0	+
V	6029245	6029680	.	0	+
V	6200216	6201040	.	0	+
V	6223344	6224089	.	0	+
V	6529351	6529966	.	0	+
V	6576963	6577578	.	0	+
V	6582477	6583385	.	0	+
V	6687169	6687908	.	0	+
V	6738615	6739356	.	0	+
V	6768043	6768932	.	0	+
V	6831356	6831749	.	0	+
V	6841581	6842352	.	0	+
V	6867459	6868083	.	0	+
V	6913221	6913838	.	0	+
V	6914264	6914643	.	0	+
V	7106478	7107300	.	0	+
V	7119129	7119647	.	0	+
V	7191511	7191997	.	0	+
V	7247047	7247407	.	0	+
V	7630158	7630866	.	0	+
V	7837422	7837932	.	0	+
V	8108885	8109212	.	0	+
V	8326872	8327741	.	0	+
V	8426758	8427378	.	0	+
V	8444073	8444761	.	0	+
V	8456932	8457380	.	0	+
V	8477704	8478275	.	0	+
V	8481194	8481606	.	0	+
V	8481788	8482182	.	0	+
V	8578344	8578916	.	0	+
V	8615513	8616013	.	0	+
V	8627667	8628185	.	0	+
V	8629204	8629763	.	0	+
V	8653738	8654083	.	0	+
V	8769144	8769668	.	0	+
V	8802229	8802772	.	0	+
V	8913914	8914846	.	0	+
V	9034293	9035222	.	0	+
V	9062750	9063331	.	0	+
V	9067757	9068471	.	0	+
V	9160397	9161593	.	0	+
V	9165890	9166431	.	0	+
V	9232031	9232493	.	0	+
V	9270588	9271341	.	0	+
V	9336194	9337149	.	0	+
V	9492432	9492950	.	0	+
V	9518416	9518796	.	0	+
V	9620210	9621090	.	0	+
V	9662287	9662670	.	0	+
V	9708182	9708614	.	0	+
V	9731274	9732403	.	0	+
V	9935643	9936147	.	0	+
V	10043345	10044400	.	0	+
V	10400138	10400325	.	0	+
V	10448646	10449016	.	0	+
V	10573750	10574369	.	0	+
V	10592499	10593411	.	0	+
V	10723800	10725348	.	0	+
V	10730956	10731757	.	0	+
V	10739569	10740083	.	0	+
V	10759676	10760127	.	0	+
V	10869254	10870187	.	0	+
V	10890933	10891538	.	0	+
V	10898135	10899470	.	0	+
V	10951380	10951719	.	0	+
V	11084061	11084565	.	0	+
V	11192357	11192976	.	0	+
V	11215597	11216009	.	0	+
V	11284341	11284806	.	0	+
V	11513220	11514066	.	0	+
V	11517557	11518620	.	0	+
V	11678540	11679243	.	0	+
V	11705394	11706010	.	0	+
V	11739103	11739561	.	0	+
V	11777927	11778350	.	0	+
V	11909455	11909706	.	0	+
V	11925450	11925793	.	0	+
V	12046245	12047108	.	0	+
V	12156082	12156375	.	0	+
V	12179696	12179802	.	0	+
V	12199372	12200115	.	0	+
V	12294406	12294875	.	0	+
V	12308773	12309619	.	0	+
V	12486373	12487019	.	0	+
V	12553012	12553891	.	0	+
V	12555387	12555824	.	0	+
V	12614448	12614891	.	0	+
V	12843566	12844137	.	0	+
V	12877562	12878568	.	0	+
V	12961024	12962317	.	0	+
V	12992628	12993831	.	0	+
V	13022191	13023256	.	0	+
V	13099489	13100145	.	0	+
V	13147498	13148184	.	0	+
V	13150752	13151207	.	0	+
V	13180870	13181346	.	0	+
V	13195778	13196777	.	0	+
V	13197118	13198166	.	0	+
V	13389274	13389530	.	0	+
V	13616095	13616688	.	0	+
V	13632354	13632972	.	0	+
V	13680855	13681510	.	0	+
V	13873510	13874223	.	0	+
V	14104502	14104679	.	0	+
V	14194644	14195794	.	0	+
V	14196254	14197324	.	0	+
V	14318929	14319685	.	0	+
V	14324869	14325774	.	0	+
V	14350102	14350590	.	0	+
V	14404845	14405685	.	0	+
V	14563282	14563761	.	0	+
V	14605053	14605619	.	0	+
V	14744714	14745128	.	0	+
V	14763948	14764241	.	0	+
V	14784785	14785647	.	0	+
V	14801742	14802158	.	0	+
V	14806182	14806939	.	0	+
V	14840789	14841576	.	0	+
V	14870169	14870519	.	0	+
V	14891763	14892578	.	0	+
V	14905237	14905807	.	0	+
V	15026176	15026698	.	0	+
V	15040268	15041295	.	0	+
V	15043109	15043503	.	0	+
V	15383087	15383576	.	0	+
V	15459996	15460980	.	0	+
V	15564754	15565451	.	0	+
V	15589632	15589756	.	0	+
V	15610188	15610701	.	0	+
V	15664348	15664775	.	0	+
V	15735062	15735479	.	0	+
V	15783833	15784492	.	0	+
V	15957180	15958049	.	0	+
V	16017115	16017817	.	0	+
V	16279212	16279461	.	0	+
V	16305334	16306005	.	0	+
V	16407071	16407540	.	0	+
V	16424995	16425411	.	0	+
V	16439842	16440798	.	0	+
V	16533664	16533941	.	0	+
V	16553098	16553159	.	0	+
V	16632329	16632994	.	0	+
V	16647517	16648322	.	0	+
V	16703455	16704280	.	0	+
V	16723890	16724211	.	0	+
V	16733466	16733700	.	0	+
V	16744565	16745167	.	0	+
V	16777944	16778589	.	0	+
V	16778685	16778889	.	0	+
V	16834312	16834927	.	0	+
V	16841882	16842977	.	0	+
V	16843407	16844562	.	0	+
V	16855218	16855536	.	0	+
V	16856498	16857105	.	0	+
V	16858777	16859500	.	0	+
V	16868906	16869547	.	0	+
V	16892546	16893118	.	0	+
V	16901683	16902563	.	0	+
V	16929036	16929525	.	0	+
V	16936945	16937205	.	0	+
V	16951066	16951890	.	0	+
V	16956025	16956341	.	0	+
V	16967924	16968441	.	0	+
V	16988365	16988856	.	0	+
V	16998751	16999775	.	0	+
V	17002972	17003384	.	0	+
V	17010992	17012737	.	0	+
V	17042422	17043288	.	0	+
V	17047421	17047848	.	0	+
V	17051714	17052479	.	0	+
V	17054731	17055965	.	0	+
V	17057793	17059798	.	0	+
V	17062069	17063042	.	0	+
V	17064402	17065108	.	0	+
V	17066599	17067469	.	0	+
V	17106622	17107195	.	0	+
V	17116272	17117009	.	0	+
V	17133390	17134231	.	0	+
V	17135661	17136208	.	0	+
V	17138599	17139199	.	0	+
V	17139486	17144299	.	0	+
V	17146961	17147814	.	0	+
V	17152833	17153114	.	0	+
V	17156255	17156748	.	0	+
V	17203461	17204236	.	0	+
V	17207468	17208937	.	0	+
V	17219519	17220936	.	0	+
V	17231026	17232005	.	0	+
V	17233041	17233901	.	0	+
V	17233950	17234692	.	0	+
V	17305647	17306999	.	0	+
V	17322931	17324907	.	0	+
V	17327015	17328298	.	0	+
V	17333211	17334565	.	0	+
V	17367182	17368568	.	0	+
V	17368577	17369165	.	0	+
V	17378521	17379007	.	0	+
V	17410787	17411944	.	0	+
V	17422916	17423858	.	0	+
V	17424134	17425270	.	0	+
V	17433618	17434285	.	0	+
V	17442229	17443125	.	0	+
V	17450718	17451442	.	0	+
V	17455481	17455854	.	0	+
V	17461187	17461999	.	0	+
V	17462122	17462833	.	0	+
V	17464572	17465916	.	0	+
V	17484234	17485293	.	0	+
V	17499507	17501833	.	0	+
V	17503595	17504333	.	0	+
V	17545248	17545810	.	0	+
V	17549913	17550739	.	0	+
V	17570391	17571559	.	0	+
V	17575961	17577000	.	0	+
V	17578022	17578670	.	0	+
V	17580111	17580904	.	0	+
V	17588580	17589349	.	0	+
V	17594656	17595285	.	0	+
V	17595468	17596767	.	0	+
V	17610646	17611174	.	0	+
V	17638586	17639322	.	0	+
V	17704384	17705712	.	0	+
V	17728241	17729169	.	0	+
V	17738372	17739912	.	0	+
V	17745314	17745824	.	0	+
V	17793137	17794596	.	0	+
V	17801952	17802443	.	0	+
V	17831498	17832189	.	0	+
V	17832843	17835330	.	0	+
V	17943812	17944419	.	0	+
V	18018566	18019243	.	0	+
V	18120442	18121386	.	0	+
V	18140156	18140600	.	0	+
V	18158381	18158769	.	0	+
V	18188551	18189522	.	0	+
V	18217516	18218009	.	0	+
V	18256703	18256759	.	0	+
V	18259697	18261104	.	0	+
V	18261367	18262124	.	0	+
V	18262862	18263505	.	0	+
V	18267430	18268163	.	0	+
V	18271642	18272291	.	0	+
V	18326551	18327563	.	0	+
V	18403082	18404314	.	0	+
V	18406237	18407692	.	0	+
V	18415668	18416849	.	0	+
V	18435989	18437489	.	0	+
V	18437691	18439917	.	0	+
V	18440000	18440462	.	0	+
V	18444036	18445565	.	0	+
V	18445624	18446103	.	0	+
V	18446267	18446934	.	0	+
V	18448358	18448776	.	0	+
V	18449744	18451120	.	0	+
V	18451643	18452950	.	0	+
V	18453080	18455163	.	0	+
V	18478983	18479843	.	0	+
V	18655971	18657584	.	0	+
V	18660131	18660947	.	0	+
V	18699439	18699779	.	0	+
V	18710939	18711525	.	0	+
V	18728784	18729133	.	0	+
V	18732107	18733191	.	0	+
V	18740448	18742166	.	0	+
V	18775795	18776310	.	0	+
V	18815089	18816370	.	0	+
V	18943354	18944178	.	0	+
V	19015953	19016521	.	0	+
V	19273716	19274481	.	0	+
V	19275725	19278309	.	0	+
V	19307828	19309298	.	0	+
V	19311120	19311594	.	0	+
V	19325201	19325947	.	0	+
V	19329169	19329847	.	0	+
V	19355179	19355435	.	0	+
V	19372308	19372385	.	0	+
V	19429135	19429866	.	0	+
V	19485066	19486351	.	0	+
V	19490110	19491123	.	0	+
V	19510851	19511285	.	0	+
V	19514507	19516603	.	0	+
V	19517481	19517686	.	0	+
V	19604982	19605809	.	0	+
V	19709258	19709963	.	0	+
V	19712570	19713361	.	0	+
V	19713788	19715646	.	0	+
V	19747916	19748502	.	0	+
V	19753358	19753439	.	0	+
V	19777017	19777742	.	0	+
V	19790101	19790918	.	0	+
V	19857656	19858110	.	0	+
V	20153203	20153774	.	0	+
V	20177924	20179122	.	0	+
V	20291566	20292125	.	0	+
V	20302345	20303771	.	0	+
V	20304195	20305645	.	0	+
V	20307047	20307823	.	0	+
V	20322639	20323269	.	0	+
V	20359443	20359658	.	0	+
V	20359709	20360928	.	0	+
V	20368776	20369405	.	0	+
V	20444304	20444911	.	0	+
V	20506947	20507643	.	0	+
V	20557685	20558389	.	0	+
V	20597555	20597661	.	0	+
V	20611854	20613410	.	0	+
V	20618328	20619226	.	0	+
V	20625043	20625621	.	0	+
V	20659848	20660716	.	0	+
V	20666804	20667530	.	0	+
V	20668001	20669048	.	0	+
V	20670618	20671856	.	0	+
V	20674948	20675681	.	0	+
X	67629	67882	.	0	+
X	86374	87039	.	0	+
X	173399	174000	.	0	+
X	484876	485514	.	0	+
X	503880	504690	.	0	+
X	543230	543965	.	0	+
X	563940	564829	.	0	+
X	567145	567911	.	0	+
X	806042	807033	.	0	+
X	1405318	1405488	.	0	+
X	1550120	1550649	.	0	+
X	1551113	1551639	.	0	+
X	1554368	1554588	.	0	+
X	1570306	1570925	.	0	+
X	1571242	1571492	.	0	+
X	1571560	1571789	.	0	+
X	1614697	1615056	.	0	+
X	1660643	1661353	.	0	+
X	1684123	1686138	.	0	+
X	1763283	1764199	.	0	+
X	1766733	1767139	.	0	+
X	1767144	1768350	.	0	+
X	1768382	1769621	.	0	+
X	1770090	1770914	.	0	+
X	1771332	1773694	.	0	+
X	1777546	1777995	.	0	+
X	1786584	1788035	.	0	+
X	1869779	1870673	.	0	+
X	1912679	1912918	.	0	+
X	1986658	1987247	.	0	+
X	2112821	2113564	.	0	+
X	2117541	2118004	.	0	+
X	2218404	2219171	.	0	+
X	2304609	2305066	.	0	+
X	2422434	2422960	.	0	+
X	2541032	2541874	.	0	+
X	2842312	2843037	.	0	+
X	2864684	2865042	.	0	+
X	2891193	2891716	.	0	+
X	2927875	2928625	.	0	+
X	3023900	3025704	.	0	+
X	3094111	3094727	.	0	+
X	3146524	3147425	.	0	+
X	3198389	3198889	.	0	+
X	3482882	3483416	.	0	+
X	3571578	3572970	.	0	+
X	3668702	3669341	.	0	+
X	3697005	3698403	.	0	+
X	3698791	3699436	.	0	+
X	3749472	3750287	.	0	+
X	3751135	3752321	.	0	+
X	3752356	3753105	.	0	+
X	3769067	3769752	.	0	+
X	3904414	3905037	.	0	+
X	3932836	3933081	.	0	+
X	4439430	4440047	.	0	+
X	4879388	4880569	.	0	+
X	4991100	4991675	.	0	+
X	5002795	5003112	.	0	+
X	5133546	5134399	.	0	+
X	5163014	5163627	.	0	+
X	5283191	5284026	.	0	+
X	5533693	5534181	.	0	+
X	5647234	5648032	.	0	+
X	5794490	5794628	.	0	+
X	5868778	5869408	.	0	+
X	5995219	5996011	.	0	+
X	6014955	6016013	.	0	+
X	6066426	6066972	.	0	+
X	6327184	6327883	.	0	+
X	6565457	6565810	.	0	+
X	6649416	6649791	.	0	+
X	6749950	6750393	.	0	+
X	6895207	6895941	.	0	+
X	6940828	6941452	.	0	+
X	7137459	7137852	.	0	+
X	7330402	7331768	.	0	+
X	7362115	7362601	.	0	+
X	7363456	7364159	.	0	+
X	7511316	7511810	.	0	+
X	7525346	7525773	.	0	+
X	7589411	7589978	.	0	+
X	7591650	7592262	.	0	+
X	7593851	7594535	.	0	+
X	7632900	7633274	.	0	+
X	7715393	7716046	.	0	+
X	7746960	7747374	.	0	+
X	8024456	8024657	.	0	+
X	8341827	8343055	.	0	+
X	8372278	8372655	.	0	+
X	8405990	8406701	.	0	+
X	8510113	8510836	.	0	+
X	8589308	8589896	.	0	+
X	9201026	9201702	.	0	+
X	9202122	9203342	.	0	+
X	9367665	9368654	.	0	+
X	9547104	9547615	.	0	+
X	9763601	9764362	.	0	+
X	9946598	9947168	.	0	+
X	10302017	10302635	.	0	+
X	10304004	10304994	.	0	+
X	10428857	10430313	.	0	+
X	10790578	10791665	.	0	+
X	11007519	11008130	.	0	+
X	11009403	11010086	.	0	+
X	11141254	11142382	.	0	+
X	11233512	11233960	.	0	+
X	11533762	11535130	.	0	+
X	11594807	11596174	.	0	+
X	11700316	11700748	.	0	+
X	12184287	12184999	.	0	+
X	12206521	12207293	.	0	+
X	12300227	12301108	.	0	+
X	12537281	12537915	.	0	+
X	12746990	12747550	.	0	+
X	12759428	12760107	.	0	+
X	12911855	12912743	.	0	+
X	12932784	12933510	.	0	+
X	13112401	13112825	.	0	+
X	13352348	13352698	.	0	+
X	13353467	13353633	.	0	+
X	13744740	13745238	.	0	+
X	13939257	13940008	.	0	+
X	13940899	13941452	.	0	+
X	14000572	14001932	.	0	+
X	14563861	14564360	.	0	+
X	14656123	14656726	.	0	+
X	14682731	14683413	.	0	+
X	14708117	14708487	.	0	+
X	14766252	14766707	.	0	+
X	14881668	14882438	.	0	+
X	14922480	14923271	.	0	+
X	15026024	15026601	.	0	+
X	15070658	15071107	.	0	+
X	15259721	15260531	.	0	+
X	15290203	15291247	.	0	+
X	15305392	15306402	.	0	+
X	15380681	15380777	.	0	+
X	15395586	15396408	.	0	+
X	15485342	15485744	.	0	+
X	15515948	15517489	.	0	+
X	15540539	15541253	.	0	+
X	15650429	15651052	.	0	+
X	15704851	15705171	.	0	+
X	15941580	15941877	.	0	+
X	15994792	15995592	.	0	+
X	16329743	16330090	.	0	+
X	16517887	16518430	.	0	+
X	16653963	16654265	.	0	+
X	16655157	16655770	.	0	+
X	16657844	16658676	.	0	+
X	16810758	16811631	.	0	+
X	16833176	16833551	.	0	+
X	16835238	16836561	.	0	+
X	16997407	16997759	.	0	+
X	17117504	17117863	.	0	+
X	17369251	17369901	.	0	+
X	17373827	17374475	.	0	+
X	17420329	17421931	.	0	+
X	17516555	17517223	.	0	+

## Sheet: HPL-2 hypodermis
I	23003	23160	.	0	+
I	40875	41808	.	0	+
I	43018	43738	.	0	+
I	43806	45243	.	0	+
I	67245	68237	.	0	+
I	140157	141756	.	0	+
I	228167	229307	.	0	+
I	230050	231298	.	0	+
I	262398	264671	.	0	+
I	283274	284431	.	0	+
I	295586	296036	.	0	+
I	306393	307188	.	0	+
I	393614	394382	.	0	+
I	438049	439015	.	0	+
I	447990	449579	.	0	+
I	482568	482804	.	0	+
I	485551	486301	.	0	+
I	515049	515560	.	0	+
I	547212	547851	.	0	+
I	592083	593663	.	0	+
I	597308	598185	.	0	+
I	607034	608134	.	0	+
I	613666	614991	.	0	+
I	615157	616190	.	0	+
I	639008	647060	.	0	+
I	647618	649930	.	0	+
I	651742	652958	.	0	+
I	702104	702616	.	0	+
I	702779	703873	.	0	+
I	735985	738030	.	0	+
I	772534	773718	.	0	+
I	803585	805272	.	0	+
I	838382	838847	.	0	+
I	840260	841170	.	0	+
I	842759	844092	.	0	+
I	847122	848965	.	0	+
I	849717	851233	.	0	+
I	881226	883019	.	0	+
I	886559	888546	.	0	+
I	889072	890564	.	0	+
I	909091	909947	.	0	+
I	920257	922027	.	0	+
I	990781	991449	.	0	+
I	993007	994347	.	0	+
I	994838	997451	.	0	+
I	1015290	1016066	.	0	+
I	1017960	1019104	.	0	+
I	1033078	1034936	.	0	+
I	1048939	1053362	.	0	+
I	1087449	1090841	.	0	+
I	1107814	1108888	.	0	+
I	1129313	1129710	.	0	+
I	1133052	1133624	.	0	+
I	1149739	1150537	.	0	+
I	1155295	1156167	.	0	+
I	1217393	1218148	.	0	+
I	1218179	1218820	.	0	+
I	1230334	1231315	.	0	+
I	1265040	1265582	.	0	+
I	1296017	1297184	.	0	+
I	1333270	1334010	.	0	+
I	1336103	1336761	.	0	+
I	1443952	1445633	.	0	+
I	1452665	1454584	.	0	+
I	1454745	1456032	.	0	+
I	1466099	1466473	.	0	+
I	1475629	1477302	.	0	+
I	1477424	1478937	.	0	+
I	1480664	1481191	.	0	+
I	1481339	1482706	.	0	+
I	1486491	1488382	.	0	+
I	1553732	1554488	.	0	+
I	1557151	1557599	.	0	+
I	1558253	1558838	.	0	+
I	1599187	1600189	.	0	+
I	1646131	1648765	.	0	+
I	1648949	1650282	.	0	+
I	1666903	1670103	.	0	+
I	1673151	1673917	.	0	+
I	1730940	1731934	.	0	+
I	1738062	1740112	.	0	+
I	1821673	1822810	.	0	+
I	1846166	1847925	.	0	+
I	1875453	1875937	.	0	+
I	1892457	1893831	.	0	+
I	1914603	1915545	.	0	+
I	1916487	1916568	.	0	+
I	1977733	1978799	.	0	+
I	2005964	2006295	.	0	+
I	2035590	2038651	.	0	+
I	2041002	2041930	.	0	+
I	2048560	2049953	.	0	+
I	2055106	2056600	.	0	+
I	2056830	2059419	.	0	+
I	2059502	2060301	.	0	+
I	2061861	2062179	.	0	+
I	2253725	2254834	.	0	+
I	2294047	2294558	.	0	+
I	2324914	2325443	.	0	+
I	2354684	2355760	.	0	+
I	2376700	2377828	.	0	+
I	2381026	2381227	.	0	+
I	2408931	2409787	.	0	+
I	2417203	2417322	.	0	+
I	2424142	2425553	.	0	+
I	2478221	2478892	.	0	+
I	2525174	2526071	.	0	+
I	2559509	2560015	.	0	+
I	2589587	2591429	.	0	+
I	2613069	2614576	.	0	+
I	2617012	2620169	.	0	+
I	2632071	2633158	.	0	+
I	2647550	2649969	.	0	+
I	2650116	2652723	.	0	+
I	2654518	2655870	.	0	+
I	2665409	2666627	.	0	+
I	2667664	2667709	.	0	+
I	2681442	2683589	.	0	+
I	2687191	2689165	.	0	+
I	2733037	2733338	.	0	+
I	2736861	2737330	.	0	+
I	2776489	2778010	.	0	+
I	2887482	2887865	.	0	+
I	2905478	2907413	.	0	+
I	2915729	2916373	.	0	+
I	2916402	2917321	.	0	+
I	3000792	3001332	.	0	+
I	3038824	3040207	.	0	+
I	3208137	3208534	.	0	+
I	3209133	3210022	.	0	+
I	3287580	3287911	.	0	+
I	3335924	3337340	.	0	+
I	3371120	3372333	.	0	+
I	3373042	3373468	.	0	+
I	3376128	3376743	.	0	+
I	3381309	3381880	.	0	+
I	3398112	3398913	.	0	+
I	3399117	3400355	.	0	+
I	3563667	3564356	.	0	+
I	3708626	3711121	.	0	+
I	3897225	3897955	.	0	+
I	3975990	3976758	.	0	+
I	3988123	3988945	.	0	+
I	4020486	4021327	.	0	+
I	4035243	4035661	.	0	+
I	4045032	4046901	.	0	+
I	4063740	4065051	.	0	+
I	4066259	4066859	.	0	+
I	4067852	4069458	.	0	+
I	4070004	4071244	.	0	+
I	4230494	4231307	.	0	+
I	4459722	4461101	.	0	+
I	4461978	4464475	.	0	+
I	4474177	4476171	.	0	+
I	4764555	4766227	.	0	+
I	4935364	4935763	.	0	+
I	5144493	5146162	.	0	+
I	5261117	5261545	.	0	+
I	5596063	5596838	.	0	+
I	5977411	5978734	.	0	+
I	6062202	6063400	.	0	+
I	6116008	6118360	.	0	+
I	6351744	6352306	.	0	+
I	6660482	6661575	.	0	+
I	6762047	6763767	.	0	+
I	6769536	6771619	.	0	+
I	6854542	6854961	.	0	+
I	7259088	7259792	.	0	+
I	7378636	7379212	.	0	+
I	7384017	7384419	.	0	+
I	7712534	7713251	.	0	+
I	7865524	7866517	.	0	+
I	7928431	7929108	.	0	+
I	7947960	7948690	.	0	+
I	8332319	8333019	.	0	+
I	8749752	8750539	.	0	+
I	9300385	9301530	.	0	+
I	9383543	9384824	.	0	+
I	9497176	9498413	.	0	+
I	9855877	9857664	.	0	+
I	10754290	10754759	.	0	+
I	10807087	10807950	.	0	+
I	10883921	10884436	.	0	+
I	11016534	11017920	.	0	+
I	11024427	11026162	.	0	+
I	11060337	11061528	.	0	+
I	11063842	11064669	.	0	+
I	11064822	11065406	.	0	+
I	11184015	11184473	.	0	+
I	11185077	11186348	.	0	+
I	11200673	11200724	.	0	+
I	11234474	11235261	.	0	+
I	11255125	11255779	.	0	+
I	11292969	11295825	.	0	+
I	11306978	11307720	.	0	+
I	11328975	11331603	.	0	+
I	11390725	11393382	.	0	+
I	11439973	11440965	.	0	+
I	11443201	11443628	.	0	+
I	11487455	11487870	.	0	+
I	11490332	11491499	.	0	+
I	11494685	11495624	.	0	+
I	11498924	11499265	.	0	+
I	11500038	11502161	.	0	+
I	11518945	11519784	.	0	+
I	11531456	11532301	.	0	+
I	11540138	11541050	.	0	+
I	11544088	11544972	.	0	+
I	11560083	11561290	.	0	+
I	11565880	11566452	.	0	+
I	11580852	11582378	.	0	+
I	11660523	11661577	.	0	+
I	11669708	11672929	.	0	+
I	11676831	11677057	.	0	+
I	11677384	11679402	.	0	+
I	11686904	11688554	.	0	+
I	11723764	11724668	.	0	+
I	11765644	11766068	.	0	+
I	11767654	11768417	.	0	+
I	11768591	11769130	.	0	+
I	11770477	11771052	.	0	+
I	11793532	11795730	.	0	+
I	11870816	11872912	.	0	+
I	11874768	11875362	.	0	+
I	11884106	11885624	.	0	+
I	11969032	11970435	.	0	+
I	11977407	11978934	.	0	+
I	12007192	12007924	.	0	+
I	12056541	12059652	.	0	+
I	12074373	12074929	.	0	+
I	12096660	12097815	.	0	+
I	12104648	12105203	.	0	+
I	12113971	12114357	.	0	+
I	12127318	12128183	.	0	+
I	12168473	12169247	.	0	+
I	12214733	12215375	.	0	+
I	12276824	12277594	.	0	+
I	12299637	12300194	.	0	+
I	12388012	12388708	.	0	+
I	12425059	12425665	.	0	+
I	12454473	12455383	.	0	+
I	12470914	12471617	.	0	+
I	12494145	12495192	.	0	+
I	12497665	12498715	.	0	+
I	12510857	12511659	.	0	+
I	12528468	12530324	.	0	+
I	12535313	12535804	.	0	+
I	12558579	12559591	.	0	+
I	12561728	12562213	.	0	+
I	12579023	12579815	.	0	+
I	12580023	12581617	.	0	+
I	12583771	12585682	.	0	+
I	12593091	12593681	.	0	+
I	12594594	12594963	.	0	+
I	12623897	12624825	.	0	+
I	12850383	12851975	.	0	+
I	12859043	12860115	.	0	+
I	13010701	13011258	.	0	+
I	13066424	13067037	.	0	+
I	13067221	13068120	.	0	+
I	13068340	13069086	.	0	+
I	13140598	13141376	.	0	+
I	13147812	13148502	.	0	+
I	13154915	13156690	.	0	+
I	13156973	13159281	.	0	+
I	13219107	13219397	.	0	+
I	13239243	13240262	.	0	+
I	13308998	13309398	.	0	+
I	13330004	13332306	.	0	+
I	13369875	13370669	.	0	+
I	13370800	13371799	.	0	+
I	13397790	13398349	.	0	+
I	13409355	13410427	.	0	+
I	13421201	13422659	.	0	+
I	13485543	13487935	.	0	+
I	13594947	13597090	.	0	+
I	13639522	13642070	.	0	+
I	13745658	13747353	.	0	+
I	13768087	13770060	.	0	+
I	13774308	13776276	.	0	+
I	13816579	13818298	.	0	+
I	13830282	13830350	.	0	+
I	13844046	13844631	.	0	+
I	13844812	13846944	.	0	+
I	13851314	13851861	.	0	+
I	13904782	13905653	.	0	+
I	13910681	13911752	.	0	+
I	13913510	13914562	.	0	+
I	13917165	13918537	.	0	+
I	13953993	13955384	.	0	+
I	13980550	13981274	.	0	+
I	13986326	13986800	.	0	+
I	13991183	13992179	.	0	+
I	14167661	14168571	.	0	+
I	14175145	14176116	.	0	+
I	14202431	14202592	.	0	+
I	14238894	14241042	.	0	+
I	14245207	14246682	.	0	+
I	14247132	14247711	.	0	+
I	14247739	14248297	.	0	+
I	14256697	14256751	.	0	+
I	14288165	14288751	.	0	+
I	14317410	14318227	.	0	+
I	14331894	14332485	.	0	+
I	14333166	14333732	.	0	+
I	14335906	14337250	.	0	+
I	14341784	14343814	.	0	+
I	14365000	14365041	.	0	+
I	14381484	14382300	.	0	+
I	14383034	14383477	.	0	+
I	14384171	14385134	.	0	+
I	14532731	14533681	.	0	+
I	14615357	14616794	.	0	+
I	14622176	14623038	.	0	+
I	14624418	14624837	.	0	+
I	14627388	14628949	.	0	+
I	14645484	14646480	.	0	+
I	14768629	14769790	.	0	+
I	14847069	14848237	.	0	+
I	14855612	14857498	.	0	+
I	14858010	14859340	.	0	+
I	14860669	14862854	.	0	+
I	14881896	14882604	.	0	+
I	14889885	14890308	.	0	+
I	14891177	14895024	.	0	+
I	14911721	14912756	.	0	+
I	14945902	14946930	.	0	+
I	14993105	14993965	.	0	+
I	14994902	14998044	.	0	+
II	437385	438627	.	0	+
II	522721	523655	.	0	+
II	626080	627627	.	0	+
II	713350	716054	.	0	+
II	716308	716968	.	0	+
II	721119	722129	.	0	+
II	787667	787947	.	0	+
II	802044	802518	.	0	+
II	806200	806693	.	0	+
II	829856	830566	.	0	+
II	845286	845829	.	0	+
II	849876	850508	.	0	+
II	858532	859367	.	0	+
II	878331	879273	.	0	+
II	904240	905448	.	0	+
II	970110	971378	.	0	+
II	1024143	1024548	.	0	+
II	1033236	1034492	.	0	+
II	1046333	1047291	.	0	+
II	1083707	1086302	.	0	+
II	1089957	1093174	.	0	+
II	1177643	1178212	.	0	+
II	1211375	1212743	.	0	+
II	1226907	1227543	.	0	+
II	1259242	1260038	.	0	+
II	1274220	1275882	.	0	+
II	1277483	1278112	.	0	+
II	1372941	1373828	.	0	+
II	1374518	1375115	.	0	+
II	1377203	1378932	.	0	+
II	1397789	1398381	.	0	+
II	1400633	1401441	.	0	+
II	1489357	1489868	.	0	+
II	1495836	1496910	.	0	+
II	1505720	1506714	.	0	+
II	1544705	1545349	.	0	+
II	1545804	1547106	.	0	+
II	1583337	1586269	.	0	+
II	1599979	1600362	.	0	+
II	1606770	1607240	.	0	+
II	1613492	1614438	.	0	+
II	1644164	1646198	.	0	+
II	1646814	1649577	.	0	+
II	1676332	1677242	.	0	+
II	1682311	1683302	.	0	+
II	1705216	1705890	.	0	+
II	1723827	1725031	.	0	+
II	1725987	1726249	.	0	+
II	1726882	1728051	.	0	+
II	1744032	1745482	.	0	+
II	1754146	1755214	.	0	+
II	1764269	1765044	.	0	+
II	1791917	1793184	.	0	+
II	1805233	1805741	.	0	+
II	1805912	1807186	.	0	+
II	1822208	1823778	.	0	+
II	1849120	1850487	.	0	+
II	1862968	1864063	.	0	+
II	1876012	1876618	.	0	+
II	1920014	1920683	.	0	+
II	1929349	1929839	.	0	+
II	1931345	1933476	.	0	+
II	1953042	1954281	.	0	+
II	2025729	2026858	.	0	+
II	2034463	2035817	.	0	+
II	2051523	2054091	.	0	+
II	2063356	2064475	.	0	+
II	2073069	2074947	.	0	+
II	2097831	2098285	.	0	+
II	2126684	2128124	.	0	+
II	2163464	2164062	.	0	+
II	2167899	2168381	.	0	+
II	2186760	2187449	.	0	+
II	2193758	2196978	.	0	+
II	2215406	2215934	.	0	+
II	2216189	2216658	.	0	+
II	2216838	2217675	.	0	+
II	2218225	2219484	.	0	+
II	2221370	2221897	.	0	+
II	2272480	2273756	.	0	+
II	2281358	2281920	.	0	+
II	2286272	2288286	.	0	+
II	2294991	2295436	.	0	+
II	2358906	2359991	.	0	+
II	2389640	2390458	.	0	+
II	2452879	2455539	.	0	+
II	2475418	2476342	.	0	+
II	2526870	2527513	.	0	+
II	2559512	2560021	.	0	+
II	2686579	2688416	.	0	+
II	2697073	2698609	.	0	+
II	2699159	2699907	.	0	+
II	2728534	2729572	.	0	+
II	2731885	2732472	.	0	+
II	2736061	2737435	.	0	+
II	2756389	2757326	.	0	+
II	2762492	2763229	.	0	+
II	2763501	2764180	.	0	+
II	2783362	2784138	.	0	+
II	2785507	2786171	.	0	+
II	2796371	2797788	.	0	+
II	2824506	2827370	.	0	+
II	2920426	2920507	.	0	+
II	2925814	2926272	.	0	+
II	2929111	2930360	.	0	+
II	2939340	2940382	.	0	+
II	2953685	2954778	.	0	+
II	2994788	2995130	.	0	+
II	2997801	3000623	.	0	+
II	3001041	3002693	.	0	+
II	3003803	3004660	.	0	+
II	3035064	3035792	.	0	+
II	3036065	3040610	.	0	+
II	3042544	3043614	.	0	+
II	3046788	3048220	.	0	+
II	3050323	3051204	.	0	+
II	3051391	3056118	.	0	+
II	3087267	3088244	.	0	+
II	3109723	3110616	.	0	+
II	3125601	3126201	.	0	+
II	3129219	3130785	.	0	+
II	3173213	3173912	.	0	+
II	3274444	3276353	.	0	+
II	3278467	3279964	.	0	+
II	3310674	3312214	.	0	+
II	3324037	3325128	.	0	+
II	3358857	3359804	.	0	+
II	3423201	3423917	.	0	+
II	3457454	3458967	.	0	+
II	3496017	3496440	.	0	+
II	3500462	3501873	.	0	+
II	3517739	3520669	.	0	+
II	3523744	3525308	.	0	+
II	3730953	3732210	.	0	+
II	3743450	3744185	.	0	+
II	3797569	3798563	.	0	+
II	4049436	4051323	.	0	+
II	4054365	4054684	.	0	+
II	4054947	4055553	.	0	+
II	4183094	4184612	.	0	+
II	4185432	4186117	.	0	+
II	4189452	4191293	.	0	+
II	4191617	4192496	.	0	+
II	4195670	4196857	.	0	+
II	4199060	4199568	.	0	+
II	4202332	4203222	.	0	+
II	4211553	4213213	.	0	+
II	4371348	4373285	.	0	+
II	4468353	4469181	.	0	+
II	4520410	4522019	.	0	+
II	4524099	4525398	.	0	+
II	4617352	4618339	.	0	+
II	4692190	4692855	.	0	+
II	4700287	4700678	.	0	+
II	5177145	5178230	.	0	+
II	5799452	5800832	.	0	+
II	5843811	5844533	.	0	+
II	6106173	6106928	.	0	+
II	6481889	6482791	.	0	+
II	6791149	6792113	.	0	+
II	7023299	7024028	.	0	+
II	7133218	7133651	.	0	+
II	7295392	7296312	.	0	+
II	7368748	7369311	.	0	+
II	7471900	7472352	.	0	+
II	7647197	7648769	.	0	+
II	7731858	7733545	.	0	+
II	7734119	7734854	.	0	+
II	7834973	7835381	.	0	+
II	7934588	7935600	.	0	+
II	8179946	8180901	.	0	+
II	8498707	8499709	.	0	+
II	8510885	8511681	.	0	+
II	8871896	8874158	.	0	+
II	8985563	8986062	.	0	+
II	9225431	9226864	.	0	+
II	9356167	9356804	.	0	+
II	9655971	9656625	.	0	+
II	9828715	9829374	.	0	+
II	9938274	9938834	.	0	+
II	10013528	10016180	.	0	+
II	10018144	10018834	.	0	+
II	10082520	10082870	.	0	+
II	10174572	10175065	.	0	+
II	10179465	10179968	.	0	+
II	11080533	11081427	.	0	+
II	11281457	11283039	.	0	+
II	11556043	11556605	.	0	+
II	11679423	11680976	.	0	+
II	11828129	11828881	.	0	+
II	11861692	11862725	.	0	+
II	11929563	11930769	.	0	+
II	11959532	11960371	.	0	+
II	11961240	11962050	.	0	+
II	11962988	11964352	.	0	+
II	11971934	11972997	.	0	+
II	12022686	12023262	.	0	+
II	12026669	12027130	.	0	+
II	12038788	12038888	.	0	+
II	12148296	12148708	.	0	+
II	12189909	12190775	.	0	+
II	12265801	12266339	.	0	+
II	12301352	12302480	.	0	+
II	12306558	12308195	.	0	+
II	12387129	12387680	.	0	+
II	12446892	12447818	.	0	+
II	12454775	12455947	.	0	+
II	12462804	12463491	.	0	+
II	12498240	12499917	.	0	+
II	12553550	12554326	.	0	+
II	12656048	12657322	.	0	+
II	12658149	12659106	.	0	+
II	12669750	12672587	.	0	+
II	12706322	12707845	.	0	+
II	12714659	12715588	.	0	+
II	12775150	12776393	.	0	+
II	12786666	12787669	.	0	+
II	12831314	12831424	.	0	+
II	12880951	12882030	.	0	+
II	12948054	12949131	.	0	+
II	13031163	13031802	.	0	+
II	13032785	13033428	.	0	+
II	13198327	13198943	.	0	+
II	13254278	13254832	.	0	+
II	13303216	13303268	.	0	+
II	13309319	13310744	.	0	+
II	13311597	13312598	.	0	+
II	13345163	13346093	.	0	+
II	13413392	13414585	.	0	+
II	13484758	13485356	.	0	+
II	13504911	13506545	.	0	+
II	13530570	13531152	.	0	+
II	13600085	13600794	.	0	+
II	13665962	13666871	.	0	+
II	13722549	13723381	.	0	+
II	13737414	13738164	.	0	+
II	13764035	13764696	.	0	+
II	13787942	13790273	.	0	+
II	13810950	13814925	.	0	+
II	13838521	13839123	.	0	+
II	13890679	13891314	.	0	+
II	13924442	13925262	.	0	+
II	13927286	13927986	.	0	+
II	13957775	13960457	.	0	+
II	13961031	13961614	.	0	+
II	13967534	13968676	.	0	+
II	14046235	14047322	.	0	+
II	14090128	14091197	.	0	+
II	14091473	14092305	.	0	+
II	14122793	14124149	.	0	+
II	14131518	14132664	.	0	+
II	14147759	14148559	.	0	+
II	14148703	14150449	.	0	+
II	14166245	14167468	.	0	+
II	14169831	14170920	.	0	+
II	14174514	14175246	.	0	+
II	14195939	14198234	.	0	+
II	14318013	14319217	.	0	+
II	14323102	14323824	.	0	+
II	14522738	14523774	.	0	+
II	14757013	14758794	.	0	+
II	14805029	14805472	.	0	+
II	14825616	14825653	.	0	+
II	15043031	15044528	.	0	+
II	15088947	15089461	.	0	+
II	15118509	15119326	.	0	+
II	15205338	15208262	.	0	+
II	15213298	15213972	.	0	+
II	15271430	15271823	.	0	+
III	48817	50259	.	0	+
III	63502	64367	.	0	+
III	115845	116497	.	0	+
III	121733	122554	.	0	+
III	139469	140798	.	0	+
III	155694	156615	.	0	+
III	159740	160361	.	0	+
III	180795	181884	.	0	+
III	208945	210080	.	0	+
III	221618	224533	.	0	+
III	350093	352005	.	0	+
III	352886	353505	.	0	+
III	355604	356288	.	0	+
III	382105	383005	.	0	+
III	384092	385616	.	0	+
III	386515	386966	.	0	+
III	398478	399800	.	0	+
III	445361	445913	.	0	+
III	508588	509366	.	0	+
III	522573	523888	.	0	+
III	692433	694544	.	0	+
III	946695	947524	.	0	+
III	949664	950336	.	0	+
III	967283	968663	.	0	+
III	969098	969799	.	0	+
III	986480	987710	.	0	+
III	1040241	1041398	.	0	+
III	1170447	1171377	.	0	+
III	1208484	1215121	.	0	+
III	1230815	1232961	.	0	+
III	1361502	1362489	.	0	+
III	1376703	1377992	.	0	+
III	1404810	1406036	.	0	+
III	1678830	1679867	.	0	+
III	1683691	1686296	.	0	+
III	1692050	1692815	.	0	+
III	1712922	1713351	.	0	+
III	1743585	1744909	.	0	+
III	1759020	1759973	.	0	+
III	1804755	1805614	.	0	+
III	1808107	1809145	.	0	+
III	1883984	1884927	.	0	+
III	1928976	1930850	.	0	+
III	1962568	1965187	.	0	+
III	1966970	1967796	.	0	+
III	1968231	1969059	.	0	+
III	1971012	1971979	.	0	+
III	1975155	1978214	.	0	+
III	1981954	1983109	.	0	+
III	2012367	2013729	.	0	+
III	2053788	2054640	.	0	+
III	2055308	2056451	.	0	+
III	2056719	2057620	.	0	+
III	2118605	2119079	.	0	+
III	2121623	2122006	.	0	+
III	2159006	2160166	.	0	+
III	2169958	2171309	.	0	+
III	2199977	2201204	.	0	+
III	2202475	2202861	.	0	+
III	2217762	2218107	.	0	+
III	2304391	2305903	.	0	+
III	2328322	2330194	.	0	+
III	2413511	2414284	.	0	+
III	2446204	2446810	.	0	+
III	2509031	2510420	.	0	+
III	2514466	2515601	.	0	+
III	2563168	2563759	.	0	+
III	2681737	2683110	.	0	+
III	2684519	2685523	.	0	+
III	2707704	2711135	.	0	+
III	2712657	2713721	.	0	+
III	2732322	2733158	.	0	+
III	2755177	2756777	.	0	+
III	2757211	2758195	.	0	+
III	2867953	2868513	.	0	+
III	2896470	2897110	.	0	+
III	2924282	2925520	.	0	+
III	2928323	2928704	.	0	+
III	2930552	2931185	.	0	+
III	2933545	2935725	.	0	+
III	2937256	2939677	.	0	+
III	2940179	2940692	.	0	+
III	2942249	2943638	.	0	+
III	2944575	2947145	.	0	+
III	2965064	2965815	.	0	+
III	2966109	2967956	.	0	+
III	3026757	3028780	.	0	+
III	3061285	3062863	.	0	+
III	3064048	3065195	.	0	+
III	3188598	3190151	.	0	+
III	3191113	3192975	.	0	+
III	3196239	3197597	.	0	+
III	3273350	3274343	.	0	+
III	3276470	3277442	.	0	+
III	3292030	3292731	.	0	+
III	3338233	3339750	.	0	+
III	3378459	3379872	.	0	+
III	3442610	3443903	.	0	+
III	3444857	3447825	.	0	+
III	3452091	3452921	.	0	+
III	3455333	3455957	.	0	+
III	3491063	3491930	.	0	+
III	3549522	3550648	.	0	+
III	3643870	3645605	.	0	+
III	3782861	3783538	.	0	+
III	3896386	3896567	.	0	+
III	4046797	4047886	.	0	+
III	4095951	4097052	.	0	+
III	4236182	4237078	.	0	+
III	4781769	4782338	.	0	+
III	5141365	5142619	.	0	+
III	5143494	5144133	.	0	+
III	5156023	5156860	.	0	+
III	5337478	5338092	.	0	+
III	5342124	5342551	.	0	+
III	5493628	5494535	.	0	+
III	5509522	5510478	.	0	+
III	5626777	5628955	.	0	+
III	5637645	5638783	.	0	+
III	5798531	5799606	.	0	+
III	5936358	5937127	.	0	+
III	5959398	5959966	.	0	+
III	5987775	5990128	.	0	+
III	6186163	6187216	.	0	+
III	6242827	6243310	.	0	+
III	6292874	6293576	.	0	+
III	6401483	6404031	.	0	+
III	6565862	6566952	.	0	+
III	6646870	6649116	.	0	+
III	6658650	6660068	.	0	+
III	6727172	6727531	.	0	+
III	6744280	6745018	.	0	+
III	6748109	6748823	.	0	+
III	7075656	7076764	.	0	+
III	7497830	7499362	.	0	+
III	7503152	7503621	.	0	+
III	7511891	7512371	.	0	+
III	7708961	7710731	.	0	+
III	7712437	7713384	.	0	+
III	7985726	7986232	.	0	+
III	8534713	8535419	.	0	+
III	9080262	9083203	.	0	+
III	9152859	9153228	.	0	+
III	9558812	9559360	.	0	+
III	9580948	9581003	.	0	+
III	9905112	9906180	.	0	+
III	9948961	9949613	.	0	+
III	10276859	10278205	.	0	+
III	10338698	10339179	.	0	+
III	10384645	10385205	.	0	+
III	10395577	10398394	.	0	+
III	10400410	10400681	.	0	+
III	10436549	10437218	.	0	+
III	10518797	10520232	.	0	+
III	10520585	10521996	.	0	+
III	10525963	10528555	.	0	+
III	10578774	10580754	.	0	+
III	10591372	10592410	.	0	+
III	10635098	10636838	.	0	+
III	10815753	10816298	.	0	+
III	10922204	10923227	.	0	+
III	10962826	10963593	.	0	+
III	11065768	11066535	.	0	+
III	11068556	11070470	.	0	+
III	11112973	11113689	.	0	+
III	11184200	11187684	.	0	+
III	11188036	11190137	.	0	+
III	11208221	11209110	.	0	+
III	11286896	11287452	.	0	+
III	11288979	11289780	.	0	+
III	11337954	11338923	.	0	+
III	11339133	11340144	.	0	+
III	11372841	11374596	.	0	+
III	11413499	11413572	.	0	+
III	11413933	11414419	.	0	+
III	11475390	11479002	.	0	+
III	11496323	11497002	.	0	+
III	11498950	11499394	.	0	+
III	11505968	11507017	.	0	+
III	11610004	11611805	.	0	+
III	11613233	11616246	.	0	+
III	11659616	11661022	.	0	+
III	11701466	11702775	.	0	+
III	11730806	11732765	.	0	+
III	11743339	11746478	.	0	+
III	11821059	11822496	.	0	+
III	11823447	11824337	.	0	+
III	11894563	11895271	.	0	+
III	11937604	11938733	.	0	+
III	11939043	11939865	.	0	+
III	12041140	12042107	.	0	+
III	12149862	12150815	.	0	+
III	12159097	12160084	.	0	+
III	12286952	12287034	.	0	+
III	12362508	12363348	.	0	+
III	12366852	12368592	.	0	+
III	12393006	12393521	.	0	+
III	12547498	12548482	.	0	+
III	12557969	12559932	.	0	+
III	12577993	12578663	.	0	+
III	12578796	12580468	.	0	+
III	12613171	12615668	.	0	+
III	12747591	12747813	.	0	+
III	12821798	12822726	.	0	+
III	12868731	12868767	.	0	+
III	12869008	12871481	.	0	+
III	12878330	12879098	.	0	+
III	12973074	12974944	.	0	+
III	12986825	12987414	.	0	+
III	13090965	13093467	.	0	+
III	13229224	13230409	.	0	+
III	13231176	13231762	.	0	+
III	13234971	13236483	.	0	+
III	13242010	13242500	.	0	+
III	13300571	13301082	.	0	+
III	13315720	13317536	.	0	+
III	13389682	13392034	.	0	+
III	13412257	13413765	.	0	+
III	13417366	13418979	.	0	+
III	13432291	13432896	.	0	+
III	13615588	13616064	.	0	+
III	13616429	13617488	.	0	+
III	13618494	13619134	.	0	+
III	13619552	13620445	.	0	+
III	13734118	13734219	.	0	+
III	13747758	13748870	.	0	+
IV	185252	186545	.	0	+
IV	363837	366787	.	0	+
IV	383841	384261	.	0	+
IV	481619	482249	.	0	+
IV	519648	521855	.	0	+
IV	605068	607055	.	0	+
IV	622409	623539	.	0	+
IV	659118	661830	.	0	+
IV	698173	698748	.	0	+
IV	742086	743016	.	0	+
IV	746461	747409	.	0	+
IV	832355	833096	.	0	+
IV	868491	868808	.	0	+
IV	879759	880456	.	0	+
IV	920034	920543	.	0	+
IV	934164	935124	.	0	+
IV	1063659	1066216	.	0	+
IV	1102844	1106161	.	0	+
IV	1126564	1126819	.	0	+
IV	1193100	1193938	.	0	+
IV	1199108	1200475	.	0	+
IV	1209776	1210348	.	0	+
IV	1249910	1251545	.	0	+
IV	1360020	1362135	.	0	+
IV	1443887	1444271	.	0	+
IV	1512985	1514442	.	0	+
IV	1536703	1537701	.	0	+
IV	1560996	1562618	.	0	+
IV	1635529	1636604	.	0	+
IV	1712525	1713600	.	0	+
IV	1718757	1719838	.	0	+
IV	1752930	1754334	.	0	+
IV	1755598	1757035	.	0	+
IV	1758907	1759854	.	0	+
IV	1785033	1785904	.	0	+
IV	1800867	1801334	.	0	+
IV	1833364	1834006	.	0	+
IV	1849237	1850140	.	0	+
IV	1939755	1940689	.	0	+
IV	1962961	1964338	.	0	+
IV	1971714	1972202	.	0	+
IV	1978844	1978997	.	0	+
IV	1979628	1980238	.	0	+
IV	2054579	2055938	.	0	+
IV	2131077	2134160	.	0	+
IV	2216275	2217162	.	0	+
IV	2220353	2222092	.	0	+
IV	2236455	2238203	.	0	+
IV	2245935	2246561	.	0	+
IV	2302156	2303684	.	0	+
IV	2390866	2392193	.	0	+
IV	2486200	2487150	.	0	+
IV	2488585	2489433	.	0	+
IV	2489705	2490976	.	0	+
IV	2491062	2491822	.	0	+
IV	2492301	2493532	.	0	+
IV	2578521	2579676	.	0	+
IV	2611532	2612522	.	0	+
IV	2650666	2652885	.	0	+
IV	2653417	2655570	.	0	+
IV	2657222	2658732	.	0	+
IV	2671896	2671948	.	0	+
IV	2674456	2675549	.	0	+
IV	2704930	2706262	.	0	+
IV	2710381	2712978	.	0	+
IV	2779531	2780452	.	0	+
IV	2805713	2807101	.	0	+
IV	2807297	2808923	.	0	+
IV	2832933	2833380	.	0	+
IV	2834843	2835290	.	0	+
IV	2862136	2862599	.	0	+
IV	2884972	2886138	.	0	+
IV	2968237	2969459	.	0	+
IV	3010534	3011155	.	0	+
IV	3012104	3012809	.	0	+
IV	3026287	3027669	.	0	+
IV	3030252	3030917	.	0	+
IV	3051632	3053082	.	0	+
IV	3100879	3101451	.	0	+
IV	3110027	3111250	.	0	+
IV	3165228	3167410	.	0	+
IV	3228391	3230797	.	0	+
IV	3230806	3232426	.	0	+
IV	3255048	3256491	.	0	+
IV	3284502	3285536	.	0	+
IV	3287660	3288049	.	0	+
IV	3367135	3367424	.	0	+
IV	3554718	3555650	.	0	+
IV	3636306	3637254	.	0	+
IV	3652230	3653064	.	0	+
IV	3656016	3656949	.	0	+
IV	3737172	3737395	.	0	+
IV	3796302	3797091	.	0	+
IV	3797266	3797856	.	0	+
IV	3797945	3798369	.	0	+
IV	3890812	3891243	.	0	+
IV	3947862	3948249	.	0	+
IV	3954437	3955439	.	0	+
IV	3961219	3961879	.	0	+
IV	3990502	3991039	.	0	+
IV	4001269	4001873	.	0	+
IV	4012099	4013131	.	0	+
IV	4039274	4040776	.	0	+
IV	4040936	4042103	.	0	+
IV	4119692	4120608	.	0	+
IV	4167838	4168270	.	0	+
IV	4168574	4169002	.	0	+
IV	4176484	4177801	.	0	+
IV	4258625	4259881	.	0	+
IV	4468479	4469033	.	0	+
IV	4658446	4659116	.	0	+
IV	4769237	4769738	.	0	+
IV	5980718	5981234	.	0	+
IV	6005724	6006911	.	0	+
IV	6012351	6013215	.	0	+
IV	6095482	6097628	.	0	+
IV	6348743	6350181	.	0	+
IV	6438050	6438955	.	0	+
IV	6823994	6824462	.	0	+
IV	6897167	6897736	.	0	+
IV	7145729	7146261	.	0	+
IV	7406355	7406953	.	0	+
IV	7425691	7426428	.	0	+
IV	8155415	8156121	.	0	+
IV	8280660	8281413	.	0	+
IV	8849011	8850094	.	0	+
IV	9077109	9077610	.	0	+
IV	9150328	9151322	.	0	+
IV	9549553	9550255	.	0	+
IV	9939725	9940278	.	0	+
IV	10030822	10031421	.	0	+
IV	10663123	10663540	.	0	+
IV	10673813	10674429	.	0	+
IV	11158941	11159411	.	0	+
IV	11373795	11374538	.	0	+
IV	11378365	11379439	.	0	+
IV	11404971	11405386	.	0	+
IV	11787386	11787675	.	0	+
IV	11975935	11976831	.	0	+
IV	11977174	11977866	.	0	+
IV	11979520	11979824	.	0	+
IV	11980372	11981423	.	0	+
IV	11981705	11982424	.	0	+
IV	11983061	11983440	.	0	+
IV	11984282	11984812	.	0	+
IV	12009703	12011000	.	0	+
IV	12616177	12618601	.	0	+
IV	12692548	12693530	.	0	+
IV	12713320	12713681	.	0	+
IV	12855970	12856389	.	0	+
IV	13037049	13037601	.	0	+
IV	13120232	13122304	.	0	+
IV	13259175	13259917	.	0	+
IV	13332765	13333547	.	0	+
IV	13366824	13367969	.	0	+
IV	13505635	13507749	.	0	+
IV	13559131	13560151	.	0	+
IV	13885062	13885643	.	0	+
IV	14064077	14064211	.	0	+
IV	14758940	14759521	.	0	+
IV	14773163	14774461	.	0	+
IV	14782780	14783984	.	0	+
IV	14844289	14844849	.	0	+
IV	15129371	15130721	.	0	+
IV	15182039	15183035	.	0	+
IV	15529513	15530091	.	0	+
IV	15555882	15556374	.	0	+
IV	15690782	15691199	.	0	+
IV	15718028	15719015	.	0	+
IV	15784958	15785652	.	0	+
IV	15798959	15800925	.	0	+
IV	15824097	15824757	.	0	+
IV	15938083	15939183	.	0	+
IV	15939205	15941332	.	0	+
IV	15983522	15984069	.	0	+
IV	16158403	16159342	.	0	+
IV	16159430	16160072	.	0	+
IV	16160121	16160825	.	0	+
IV	16160977	16162163	.	0	+
IV	16168809	16170508	.	0	+
IV	16312115	16312809	.	0	+
IV	16316627	16318140	.	0	+
IV	16397999	16399448	.	0	+
IV	16400447	16401208	.	0	+
IV	16430436	16432231	.	0	+
IV	16503740	16505196	.	0	+
IV	16866309	16868903	.	0	+
IV	17006752	17007286	.	0	+
IV	17010366	17011363	.	0	+
IV	17011846	17012940	.	0	+
IV	17098372	17099274	.	0	+
IV	17258085	17258399	.	0	+
IV	17353278	17353945	.	0	+
V	138688	139552	.	0	+
V	164568	165365	.	0	+
V	165518	165983	.	0	+
V	249266	252263	.	0	+
V	323497	324527	.	0	+
V	327171	327941	.	0	+
V	346544	347348	.	0	+
V	425227	426004	.	0	+
V	434819	435809	.	0	+
V	447661	448373	.	0	+
V	490838	491183	.	0	+
V	529687	530671	.	0	+
V	570074	571137	.	0	+
V	599637	600138	.	0	+
V	630591	631303	.	0	+
V	668417	669996	.	0	+
V	726210	726665	.	0	+
V	764881	765715	.	0	+
V	792503	793082	.	0	+
V	793121	795732	.	0	+
V	799950	800560	.	0	+
V	901727	902674	.	0	+
V	976800	978609	.	0	+
V	1149384	1152607	.	0	+
V	1199446	1201053	.	0	+
V	1204704	1205648	.	0	+
V	1220465	1222024	.	0	+
V	1341018	1343846	.	0	+
V	1381607	1382335	.	0	+
V	1463340	1464138	.	0	+
V	1464213	1466008	.	0	+
V	1481254	1482393	.	0	+
V	1584802	1585400	.	0	+
V	1588507	1589087	.	0	+
V	1762278	1762727	.	0	+
V	1762960	1764040	.	0	+
V	1774010	1774683	.	0	+
V	1775393	1775709	.	0	+
V	1908803	1909056	.	0	+
V	1991287	1992019	.	0	+
V	1992035	1993055	.	0	+
V	2053190	2053941	.	0	+
V	2054779	2057278	.	0	+
V	2076257	2076783	.	0	+
V	2144008	2144927	.	0	+
V	2239296	2240721	.	0	+
V	2272996	2274127	.	0	+
V	2611357	2612307	.	0	+
V	2629253	2630353	.	0	+
V	2651842	2653372	.	0	+
V	2669160	2669991	.	0	+
V	2674590	2676137	.	0	+
V	2685297	2685940	.	0	+
V	2717477	2719511	.	0	+
V	2785561	2786239	.	0	+
V	2786270	2787121	.	0	+
V	2788603	2790197	.	0	+
V	2790555	2792243	.	0	+
V	2796717	2797681	.	0	+
V	2798100	2798169	.	0	+
V	2799131	2802735	.	0	+
V	2803257	2804325	.	0	+
V	2924023	2925116	.	0	+
V	3080066	3080641	.	0	+
V	3129457	3129948	.	0	+
V	3162193	3163382	.	0	+
V	3255235	3255662	.	0	+
V	3268208	3269963	.	0	+
V	3272520	3276541	.	0	+
V	3278017	3279337	.	0	+
V	3284497	3285565	.	0	+
V	3286916	3290232	.	0	+
V	3291304	3292077	.	0	+
V	3303483	3304698	.	0	+
V	3310656	3311431	.	0	+
V	3312074	3314585	.	0	+
V	3333851	3335003	.	0	+
V	3338587	3340113	.	0	+
V	3342174	3343970	.	0	+
V	3352820	3353806	.	0	+
V	3358245	3358683	.	0	+
V	3382434	3382815	.	0	+
V	3386063	3387030	.	0	+
V	3388692	3390265	.	0	+
V	3393916	3397544	.	0	+
V	3398419	3402511	.	0	+
V	3411917	3413214	.	0	+
V	3454584	3456642	.	0	+
V	3665885	3666716	.	0	+
V	3683409	3683753	.	0	+
V	3685503	3685765	.	0	+
V	3685954	3686520	.	0	+
V	3691602	3692100	.	0	+
V	3692221	3695334	.	0	+
V	4129262	4131314	.	0	+
V	4169639	4171302	.	0	+
V	4181992	4182537	.	0	+
V	4208527	4209510	.	0	+
V	4305042	4306763	.	0	+
V	4351145	4351847	.	0	+
V	4520882	4521272	.	0	+
V	4526734	4528396	.	0	+
V	4557487	4558057	.	0	+
V	4578338	4579948	.	0	+
V	4580237	4581443	.	0	+
V	4693304	4694232	.	0	+
V	4754617	4755211	.	0	+
V	4995108	4995814	.	0	+
V	5044493	5045681	.	0	+
V	5053987	5055497	.	0	+
V	5110778	5112100	.	0	+
V	5124999	5125554	.	0	+
V	5128543	5129098	.	0	+
V	5158034	5159237	.	0	+
V	5161275	5162211	.	0	+
V	5181410	5183289	.	0	+
V	5187963	5189352	.	0	+
V	5193662	5195297	.	0	+
V	5214415	5214519	.	0	+
V	5217631	5220433	.	0	+
V	5226167	5226674	.	0	+
V	5267671	5268387	.	0	+
V	5274388	5274501	.	0	+
V	5277871	5278388	.	0	+
V	5295837	5296386	.	0	+
V	5299305	5299974	.	0	+
V	5302691	5303761	.	0	+
V	5476420	5476827	.	0	+
V	5477162	5478240	.	0	+
V	5743969	5744397	.	0	+
V	5755021	5756078	.	0	+
V	5766011	5766565	.	0	+
V	5883762	5884420	.	0	+
V	5996494	5996854	.	0	+
V	6198631	6199916	.	0	+
V	6204866	6205922	.	0	+
V	6342761	6343199	.	0	+
V	6379529	6380165	.	0	+
V	6416644	6417299	.	0	+
V	6469437	6470641	.	0	+
V	6636873	6637438	.	0	+
V	6764092	6765046	.	0	+
V	8413032	8413866	.	0	+
V	8481788	8482182	.	0	+
V	8483789	8484957	.	0	+
V	8486084	8486671	.	0	+
V	8578437	8578916	.	0	+
V	8713776	8714413	.	0	+
V	9241016	9241912	.	0	+
V	9496818	9497901	.	0	+
V	9620210	9620951	.	0	+
V	10087723	10088698	.	0	+
V	10145762	10147083	.	0	+
V	10472303	10474166	.	0	+
V	10652416	10652879	.	0	+
V	10681342	10682612	.	0	+
V	10718955	10720663	.	0	+
V	10724119	10726025	.	0	+
V	10810817	10810852	.	0	+
V	10866176	10867003	.	0	+
V	11307312	11308050	.	0	+
V	11399161	11400268	.	0	+
V	11486862	11487837	.	0	+
V	11505985	11506442	.	0	+
V	11533520	11533954	.	0	+
V	11704679	11705795	.	0	+
V	11919617	11920041	.	0	+
V	12156082	12156375	.	0	+
V	12213544	12214183	.	0	+
V	12340586	12342073	.	0	+
V	12477441	12478623	.	0	+
V	12861150	12861919	.	0	+
V	12966371	12967185	.	0	+
V	12968178	12969013	.	0	+
V	13147498	13148184	.	0	+
V	13160469	13162436	.	0	+
V	13228748	13229211	.	0	+
V	13307404	13308436	.	0	+
V	13397547	13399496	.	0	+
V	14056620	14057901	.	0	+
V	14100718	14101707	.	0	+
V	14146619	14148506	.	0	+
V	14177371	14178753	.	0	+
V	14360140	14361636	.	0	+
V	14442456	14444029	.	0	+
V	14573495	14574274	.	0	+
V	14842274	14842863	.	0	+
V	14870832	14872606	.	0	+
V	14905237	14905807	.	0	+
V	14988771	14989284	.	0	+
V	15154923	15155017	.	0	+
V	15454264	15454825	.	0	+
V	15500165	15502558	.	0	+
V	15562014	15564127	.	0	+
V	15564188	15565437	.	0	+
V	15580297	15580797	.	0	+
V	15661102	15661622	.	0	+
V	15731559	15732602	.	0	+
V	15758719	15759439	.	0	+
V	16272705	16272819	.	0	+
V	16346946	16348589	.	0	+
V	16372025	16373743	.	0	+
V	16532323	16533996	.	0	+
V	16534862	16535372	.	0	+
V	16629468	16630370	.	0	+
V	16640369	16641431	.	0	+
V	16647517	16648354	.	0	+
V	16700640	16701473	.	0	+
V	16718640	16719866	.	0	+
V	16723890	16724211	.	0	+
V	16734437	16735402	.	0	+
V	16743771	16744094	.	0	+
V	16744565	16745167	.	0	+
V	16760564	16761734	.	0	+
V	16829920	16830798	.	0	+
V	16834926	16836522	.	0	+
V	16844561	16845918	.	0	+
V	16853167	16853778	.	0	+
V	16856498	16857319	.	0	+
V	16860305	16860929	.	0	+
V	16866906	16869517	.	0	+
V	16873810	16874866	.	0	+
V	16892546	16893118	.	0	+
V	16895469	16895942	.	0	+
V	16914166	16915026	.	0	+
V	16933003	16933044	.	0	+
V	16967924	16968441	.	0	+
V	16988365	16988856	.	0	+
V	16998751	16999775	.	0	+
V	17002322	17003128	.	0	+
V	17010992	17013228	.	0	+
V	17042422	17043288	.	0	+
V	17051615	17052479	.	0	+
V	17054860	17055965	.	0	+
V	17057524	17060449	.	0	+
V	17062626	17063042	.	0	+
V	17063272	17064146	.	0	+
V	17064318	17065108	.	0	+
V	17076927	17077473	.	0	+
V	17098430	17099769	.	0	+
V	17103953	17104765	.	0	+
V	17107053	17108077	.	0	+
V	17118089	17118872	.	0	+
V	17126728	17127788	.	0	+
V	17133390	17134231	.	0	+
V	17134918	17135939	.	0	+
V	17138599	17139077	.	0	+
V	17139746	17141823	.	0	+
V	17142580	17143147	.	0	+
V	17146961	17148447	.	0	+
V	17152770	17153114	.	0	+
V	17155392	17158319	.	0	+
V	17159022	17159900	.	0	+
V	17162919	17163524	.	0	+
V	17187122	17188144	.	0	+
V	17205865	17208121	.	0	+
V	17219519	17220936	.	0	+
V	17227144	17227930	.	0	+
V	17231026	17232623	.	0	+
V	17233216	17233872	.	0	+
V	17238220	17238739	.	0	+
V	17241567	17242642	.	0	+
V	17248138	17249955	.	0	+
V	17259249	17259940	.	0	+
V	17274593	17275215	.	0	+
V	17295222	17296173	.	0	+
V	17305647	17306999	.	0	+
V	17314502	17317812	.	0	+
V	17321279	17321781	.	0	+
V	17322931	17323776	.	0	+
V	17324333	17325734	.	0	+
V	17327015	17328419	.	0	+
V	17333114	17334565	.	0	+
V	17357556	17359037	.	0	+
V	17366191	17367079	.	0	+
V	17367957	17368568	.	0	+
V	17375165	17375623	.	0	+
V	17378545	17379007	.	0	+
V	17410323	17411385	.	0	+
V	17416956	17418281	.	0	+
V	17422916	17424740	.	0	+
V	17426519	17428920	.	0	+
V	17433618	17434564	.	0	+
V	17447978	17448927	.	0	+
V	17464572	17465553	.	0	+
V	17484234	17485293	.	0	+
V	17499507	17501086	.	0	+
V	17544345	17546243	.	0	+
V	17549913	17550739	.	0	+
V	17552031	17553140	.	0	+
V	17553442	17554194	.	0	+
V	17576951	17577000	.	0	+
V	17578535	17579038	.	0	+
V	17580111	17580904	.	0	+
V	17585054	17585969	.	0	+
V	17588580	17589349	.	0	+
V	17592619	17593013	.	0	+
V	17595468	17596767	.	0	+
V	17597127	17599026	.	0	+
V	17606207	17606828	.	0	+
V	17638836	17639355	.	0	+
V	17682403	17683407	.	0	+
V	17705702	17706887	.	0	+
V	17724646	17725104	.	0	+
V	17725534	17726623	.	0	+
V	17727034	17729169	.	0	+
V	17748917	17749595	.	0	+
V	17760698	17761635	.	0	+
V	17793137	17794596	.	0	+
V	17801952	17802409	.	0	+
V	17832843	17835330	.	0	+
V	17928223	17928671	.	0	+
V	17929648	17930240	.	0	+
V	18031162	18032570	.	0	+
V	18119896	18120456	.	0	+
V	18123079	18123540	.	0	+
V	18140156	18140600	.	0	+
V	18158335	18159093	.	0	+
V	18164833	18166164	.	0	+
V	18196500	18199087	.	0	+
V	18217516	18218009	.	0	+
V	18221448	18221940	.	0	+
V	18260596	18261104	.	0	+
V	18271642	18272291	.	0	+
V	18290772	18292087	.	0	+
V	18319628	18321280	.	0	+
V	18322855	18323229	.	0	+
V	18326551	18327651	.	0	+
V	18406237	18408165	.	0	+
V	18432816	18434284	.	0	+
V	18437772	18439917	.	0	+
V	18444036	18445184	.	0	+
V	18446267	18447109	.	0	+
V	18448358	18448776	.	0	+
V	18449744	18450987	.	0	+
V	18451802	18452950	.	0	+
V	18453080	18454843	.	0	+
V	18478794	18480051	.	0	+
V	18555543	18557655	.	0	+
V	18653945	18654409	.	0	+
V	18655971	18656469	.	0	+
V	18660131	18660947	.	0	+
V	18685956	18687770	.	0	+
V	18705443	18706906	.	0	+
V	18710939	18711627	.	0	+
V	18731587	18732674	.	0	+
V	18733190	18734358	.	0	+
V	18740448	18742166	.	0	+
V	18754185	18754772	.	0	+
V	18772074	18774101	.	0	+
V	18775057	18777929	.	0	+
V	18815089	18816370	.	0	+
V	18828839	18830514	.	0	+
V	18875385	18875830	.	0	+
V	18943322	18944212	.	0	+
V	19015953	19016521	.	0	+
V	19017030	19018605	.	0	+
V	19020737	19021302	.	0	+
V	19029561	19031026	.	0	+
V	19068782	19069980	.	0	+
V	19070785	19071426	.	0	+
V	19076996	19078821	.	0	+
V	19095138	19096607	.	0	+
V	19207082	19209216	.	0	+
V	19229754	19230844	.	0	+
V	19250874	19252730	.	0	+
V	19253865	19254294	.	0	+
V	19271075	19272305	.	0	+
V	19273659	19274200	.	0	+
V	19274971	19276014	.	0	+
V	19276034	19277055	.	0	+
V	19277330	19278309	.	0	+
V	19302965	19304150	.	0	+
V	19307828	19310105	.	0	+
V	19320135	19321167	.	0	+
V	19333220	19333809	.	0	+
V	19334376	19335487	.	0	+
V	19340016	19340972	.	0	+
V	19344174	19345169	.	0	+
V	19347113	19348924	.	0	+
V	19355221	19356799	.	0	+
V	19371259	19372385	.	0	+
V	19373701	19373759	.	0	+
V	19421230	19422877	.	0	+
V	19485124	19486634	.	0	+
V	19489966	19491123	.	0	+
V	19512485	19513467	.	0	+
V	19513797	19515301	.	0	+
V	19516438	19516984	.	0	+
V	19517608	19518442	.	0	+
V	19546742	19547736	.	0	+
V	19552779	19554389	.	0	+
V	19555104	19555991	.	0	+
V	19558692	19559651	.	0	+
V	19602727	19603761	.	0	+
V	19604091	19605616	.	0	+
V	19709258	19709963	.	0	+
V	19713788	19715639	.	0	+
V	19715645	19717030	.	0	+
V	19737677	19738847	.	0	+
V	19749350	19750445	.	0	+
V	19753566	19754037	.	0	+
V	19884256	19886528	.	0	+
V	19915399	19915673	.	0	+
V	19962416	19964095	.	0	+
V	19974334	19975389	.	0	+
V	20149709	20150394	.	0	+
V	20153203	20153774	.	0	+
V	20201939	20202994	.	0	+
V	20272222	20272881	.	0	+
V	20304681	20306263	.	0	+
V	20320153	20320981	.	0	+
V	20323063	20323812	.	0	+
V	20365576	20367109	.	0	+
V	20410200	20412166	.	0	+
V	20444082	20444472	.	0	+
V	20444910	20445842	.	0	+
V	20454648	20455765	.	0	+
V	20483487	20485345	.	0	+
V	20557685	20558389	.	0	+
V	20561137	20561561	.	0	+
V	20611752	20613778	.	0	+
V	20625043	20625621	.	0	+
V	20670618	20671149	.	0	+
V	20767467	20768483	.	0	+
V	20821574	20823005	.	0	+
X	46258	47062	.	0	+
X	86374	87039	.	0	+
X	147569	148174	.	0	+
X	150310	151508	.	0	+
X	154100	157072	.	0	+
X	199127	199197	.	0	+
X	406923	407861	.	0	+
X	621220	621854	.	0	+
X	633528	633882	.	0	+
X	885329	886198	.	0	+
X	1081877	1082519	.	0	+
X	1203391	1203980	.	0	+
X	1383514	1384256	.	0	+
X	1386686	1387490	.	0	+
X	1519514	1520495	.	0	+
X	1568130	1570892	.	0	+
X	1641989	1642461	.	0	+
X	1694696	1695355	.	0	+
X	1763720	1764240	.	0	+
X	1768382	1769714	.	0	+
X	1769934	1771928	.	0	+
X	1772136	1774031	.	0	+
X	1776823	1777995	.	0	+
X	1785571	1788351	.	0	+
X	1870672	1872112	.	0	+
X	1978559	1979219	.	0	+
X	1995818	1996612	.	0	+
X	1997173	1999395	.	0	+
X	2168138	2168700	.	0	+
X	2263253	2263956	.	0	+
X	2318340	2318444	.	0	+
X	2362272	2362799	.	0	+
X	2506138	2507023	.	0	+
X	2518250	2519581	.	0	+
X	3026891	3028344	.	0	+
X	3028381	3030401	.	0	+
X	3255514	3257334	.	0	+
X	3706212	3707029	.	0	+
X	3733358	3733582	.	0	+
X	3747646	3749087	.	0	+
X	3750913	3750961	.	0	+
X	3752511	3753007	.	0	+
X	3785225	3786084	.	0	+
X	4439430	4440356	.	0	+
X	4650961	4652378	.	0	+
X	4991611	4992186	.	0	+
X	5413158	5413422	.	0	+
X	5423448	5423909	.	0	+
X	6224768	6226446	.	0	+
X	6830729	6832023	.	0	+
X	6915198	6917399	.	0	+
X	6952840	6954848	.	0	+
X	6959403	6960918	.	0	+
X	7019698	7020398	.	0	+
X	7117258	7117828	.	0	+
X	7344071	7344578	.	0	+
X	7512505	7513635	.	0	+
X	7746960	7747374	.	0	+
X	7884282	7885537	.	0	+
X	7942728	7944401	.	0	+
X	7945212	7945664	.	0	+
X	8053718	8054532	.	0	+
X	8294869	8295346	.	0	+
X	8372278	8372655	.	0	+
X	8404823	8405262	.	0	+
X	8405990	8406632	.	0	+
X	8722199	8722704	.	0	+
X	8723145	8724688	.	0	+
X	8762277	8763417	.	0	+
X	8788933	8789798	.	0	+
X	9192789	9193629	.	0	+
X	9197855	9199684	.	0	+
X	9202122	9203342	.	0	+
X	9300840	9302891	.	0	+
X	9719789	9720242	.	0	+
X	9722705	9723606	.	0	+
X	9842037	9843404	.	0	+
X	9847213	9848135	.	0	+
X	10006629	10007388	.	0	+
X	11075671	11077103	.	0	+
X	12104520	12105466	.	0	+
X	12471851	12472224	.	0	+
X	12474443	12475219	.	0	+
X	13157279	13159096	.	0	+
X	13219612	13220960	.	0	+
X	13574017	13574703	.	0	+
X	13712858	13713148	.	0	+
X	13928792	13929141	.	0	+
X	14007262	14009123	.	0	+
X	14039322	14040049	.	0	+
X	14075021	14076116	.	0	+
X	14656123	14656912	.	0	+
X	14668710	14669413	.	0	+
X	14898673	14898739	.	0	+
X	15593736	15594705	.	0	+
X	15650429	15651052	.	0	+
X	15942951	15943792	.	0	+
X	16117142	16118713	.	0	+
X	16144542	16145022	.	0	+
X	16237760	16238400	.	0	+
X	16386001	16386856	.	0	+
X	16390097	16391489	.	0	+
X	16391680	16392671	.	0	+
X	16453907	16455238	.	0	+
X	16468193	16468799	.	0	+
X	16517351	16518689	.	0	+
X	16571586	16572406	.	0	+
X	16583186	16583772	.	0	+
X	16653963	16654846	.	0	+
X	16745651	16746288	.	0	+
X	16810656	16811649	.	0	+
X	16828057	16829927	.	0	+
X	16830310	16831471	.	0	+
X	16832871	16833980	.	0	+
X	16834085	16835056	.	0	+
X	16835238	16836561	.	0	+
X	16837281	16838302	.	0	+
X	16845468	16845948	.	0	+
X	17063746	17064194	.	0	+
X	17116612	17117560	.	0	+
X	17319077	17319555	.	0	+
X	17456367	17456727	.	0	+
X	17456927	17457302	.	0	+
X	17606130	17608379	.	0	+
X	17645045	17646763	.	0	+
X	17647018	17648594	.	0	+
X	17667298	17668007	.	0	+
X	17670615	17671287	.	0	+
X	17673495	17675154	.	0	+

## Sheet: HPL-2 intestine
I	12853	13378	.	0	+
I	43109	43807	.	0	+
I	67696	68237	.	0	+
I	102866	103553	.	0	+
I	106087	108105	.	0	+
I	115662	117277	.	0	+
I	128779	129196	.	0	+
I	229713	232026	.	0	+
I	251024	251316	.	0	+
I	307187	307633	.	0	+
I	320127	320268	.	0	+
I	321303	321703	.	0	+
I	322068	322224	.	0	+
I	368813	369086	.	0	+
I	383327	385089	.	0	+
I	392463	393022	.	0	+
I	442899	443333	.	0	+
I	456855	458003	.	0	+
I	464157	464520	.	0	+
I	485551	486301	.	0	+
I	512709	512848	.	0	+
I	519224	519920	.	0	+
I	531952	532782	.	0	+
I	564399	565016	.	0	+
I	573256	575350	.	0	+
I	607034	608134	.	0	+
I	613072	613667	.	0	+
I	634124	634654	.	0	+
I	643839	645651	.	0	+
I	647972	649930	.	0	+
I	694824	695420	.	0	+
I	702104	704100	.	0	+
I	736803	738030	.	0	+
I	746845	747359	.	0	+
I	753918	755040	.	0	+
I	772570	773718	.	0	+
I	799123	799754	.	0	+
I	803585	804557	.	0	+
I	825468	826258	.	0	+
I	828315	828835	.	0	+
I	832216	832913	.	0	+
I	838382	840194	.	0	+
I	840260	841085	.	0	+
I	841124	842197	.	0	+
I	861423	861879	.	0	+
I	875854	876712	.	0	+
I	881226	883561	.	0	+
I	886559	888546	.	0	+
I	889955	890564	.	0	+
I	908567	910996	.	0	+
I	921895	922276	.	0	+
I	926569	927751	.	0	+
I	946342	947448	.	0	+
I	948977	949611	.	0	+
I	989310	990930	.	0	+
I	996155	997807	.	0	+
I	1048939	1050870	.	0	+
I	1052408	1053362	.	0	+
I	1063368	1063903	.	0	+
I	1064449	1065648	.	0	+
I	1068954	1069537	.	0	+
I	1090177	1090841	.	0	+
I	1149739	1150537	.	0	+
I	1156166	1156880	.	0	+
I	1165723	1166507	.	0	+
I	1218179	1218820	.	0	+
I	1272255	1272796	.	0	+
I	1284446	1285370	.	0	+
I	1324597	1324921	.	0	+
I	1333107	1334010	.	0	+
I	1443952	1444733	.	0	+
I	1544573	1544838	.	0	+
I	1557598	1557754	.	0	+
I	1599187	1600189	.	0	+
I	1638701	1638861	.	0	+
I	1647451	1648417	.	0	+
I	1668139	1669881	.	0	+
I	1672981	1673862	.	0	+
I	1728478	1728581	.	0	+
I	1730300	1731924	.	0	+
I	1734625	1736434	.	0	+
I	1736650	1739760	.	0	+
I	1775446	1778105	.	0	+
I	1780818	1781223	.	0	+
I	1812973	1813417	.	0	+
I	1819255	1820757	.	0	+
I	1821673	1822810	.	0	+
I	1874301	1875020	.	0	+
I	1879673	1880143	.	0	+
I	1892145	1893490	.	0	+
I	1980609	1983487	.	0	+
I	2005964	2006416	.	0	+
I	2032653	2033455	.	0	+
I	2040685	2042603	.	0	+
I	2048798	2049953	.	0	+
I	2057840	2058533	.	0	+
I	2061829	2062169	.	0	+
I	2071662	2072218	.	0	+
I	2168093	2168453	.	0	+
I	2195582	2196198	.	0	+
I	2294047	2294829	.	0	+
I	2318333	2318694	.	0	+
I	2325442	2326126	.	0	+
I	2330960	2331660	.	0	+
I	2354684	2355518	.	0	+
I	2377037	2377828	.	0	+
I	2381026	2381821	.	0	+
I	2390599	2391354	.	0	+
I	2403806	2405021	.	0	+
I	2408931	2409787	.	0	+
I	2420798	2421395	.	0	+
I	2424142	2425553	.	0	+
I	2452157	2452800	.	0	+
I	2549808	2550093	.	0	+
I	2550230	2550543	.	0	+
I	2559083	2559272	.	0	+
I	2562402	2562851	.	0	+
I	2591923	2592405	.	0	+
I	2601671	2602676	.	0	+
I	2612794	2613091	.	0	+
I	2613922	2614576	.	0	+
I	2617824	2620169	.	0	+
I	2621408	2621708	.	0	+
I	2623526	2623741	.	0	+
I	2632071	2633131	.	0	+
I	2646531	2646928	.	0	+
I	2651549	2654849	.	0	+
I	2682491	2684958	.	0	+
I	2692111	2692273	.	0	+
I	2702713	2704188	.	0	+
I	2735079	2736228	.	0	+
I	2763411	2763939	.	0	+
I	2767212	2767767	.	0	+
I	2780923	2781894	.	0	+
I	2823527	2823921	.	0	+
I	2854971	2855694	.	0	+
I	2900073	2900361	.	0	+
I	3000792	3001332	.	0	+
I	3010709	3011553	.	0	+
I	3012189	3012412	.	0	+
I	3012418	3012679	.	0	+
I	3035264	3035647	.	0	+
I	3246329	3246787	.	0	+
I	3307379	3307718	.	0	+
I	3335924	3337340	.	0	+
I	3355430	3355830	.	0	+
I	3355967	3356435	.	0	+
I	3356483	3357055	.	0	+
I	3364409	3364902	.	0	+
I	3368052	3368519	.	0	+
I	3375342	3375676	.	0	+
I	3376128	3376743	.	0	+
I	3399013	3400033	.	0	+
I	3437809	3438526	.	0	+
I	3440474	3441232	.	0	+
I	3564355	3564899	.	0	+
I	3642202	3642768	.	0	+
I	3683323	3683624	.	0	+
I	3738054	3738383	.	0	+
I	3937236	3937784	.	0	+
I	4035243	4035777	.	0	+
I	4046163	4047083	.	0	+
I	4276317	4276958	.	0	+
I	4461978	4463206	.	0	+
I	4494584	4495610	.	0	+
I	4710142	4711009	.	0	+
I	4779774	4780777	.	0	+
I	4814848	4814911	.	0	+
I	4815840	4816352	.	0	+
I	4940862	4941450	.	0	+
I	5019826	5020398	.	0	+
I	5165841	5166082	.	0	+
I	6350687	6351112	.	0	+
I	6351507	6353304	.	0	+
I	6514146	6515343	.	0	+
I	6755379	6755488	.	0	+
I	6755924	6755985	.	0	+
I	6770829	6771619	.	0	+
I	7214815	7215303	.	0	+
I	7260745	7261104	.	0	+
I	7262098	7262276	.	0	+
I	7371024	7371470	.	0	+
I	7377871	7379783	.	0	+
I	7380001	7380584	.	0	+
I	7382983	7384018	.	0	+
I	7712534	7713251	.	0	+
I	7928698	7929161	.	0	+
I	7929412	7929664	.	0	+
I	7947960	7948690	.	0	+
I	8216825	8217049	.	0	+
I	8819714	8819850	.	0	+
I	9300385	9301206	.	0	+
I	9374618	9375131	.	0	+
I	9499665	9500310	.	0	+
I	9512628	9513332	.	0	+
I	9590963	9591387	.	0	+
I	10281644	10282609	.	0	+
I	10348661	10348881	.	0	+
I	10420520	10421215	.	0	+
I	10708835	10709770	.	0	+
I	10756340	10757444	.	0	+
I	10801906	10802124	.	0	+
I	11015330	11017427	.	0	+
I	11024427	11025821	.	0	+
I	11026161	11027124	.	0	+
I	11032583	11033408	.	0	+
I	11117720	11117771	.	0	+
I	11154615	11154963	.	0	+
I	11179331	11180567	.	0	+
I	11185373	11186348	.	0	+
I	11202701	11203888	.	0	+
I	11252269	11252920	.	0	+
I	11255206	11255779	.	0	+
I	11292969	11294751	.	0	+
I	11294790	11295881	.	0	+
I	11306978	11307720	.	0	+
I	11343366	11343700	.	0	+
I	11423194	11424749	.	0	+
I	11443201	11443628	.	0	+
I	11494685	11495624	.	0	+
I	11500038	11502125	.	0	+
I	11523755	11524452	.	0	+
I	11539839	11541050	.	0	+
I	11542719	11544862	.	0	+
I	11550656	11551829	.	0	+
I	11560042	11560865	.	0	+
I	11565880	11566452	.	0	+
I	11568945	11569688	.	0	+
I	11582377	11582829	.	0	+
I	11658521	11659335	.	0	+
I	11734562	11735368	.	0	+
I	11750228	11750942	.	0	+
I	11756587	11757000	.	0	+
I	11764917	11765645	.	0	+
I	11766779	11770375	.	0	+
I	11785805	11785896	.	0	+
I	11859838	11860575	.	0	+
I	11884323	11885624	.	0	+
I	11982991	11984212	.	0	+
I	12021969	12022026	.	0	+
I	12027499	12027908	.	0	+
I	12032969	12033465	.	0	+
I	12168473	12169247	.	0	+
I	12214640	12215286	.	0	+
I	12265221	12265345	.	0	+
I	12348637	12349083	.	0	+
I	12453260	12453996	.	0	+
I	12470914	12471827	.	0	+
I	12490769	12491285	.	0	+
I	12494836	12495192	.	0	+
I	12498222	12499548	.	0	+
I	12506180	12506361	.	0	+
I	12526522	12528361	.	0	+
I	12528468	12529569	.	0	+
I	12530209	12530621	.	0	+
I	12535313	12535804	.	0	+
I	12571232	12571748	.	0	+
I	12591245	12592137	.	0	+
I	12625976	12626083	.	0	+
I	12645715	12646295	.	0	+
I	12653571	12653888	.	0	+
I	12683996	12684347	.	0	+
I	12684984	12685538	.	0	+
I	12725683	12726109	.	0	+
I	12738178	12738691	.	0	+
I	12815251	12815616	.	0	+
I	12859312	12860115	.	0	+
I	12887342	12887654	.	0	+
I	12967756	12968307	.	0	+
I	13065477	13066425	.	0	+
I	13068954	13069405	.	0	+
I	13147641	13148336	.	0	+
I	13156358	13159281	.	0	+
I	13177948	13179155	.	0	+
I	13239243	13240262	.	0	+
I	13284908	13285340	.	0	+
I	13329362	13331290	.	0	+
I	13334177	13334540	.	0	+
I	13369554	13370519	.	0	+
I	13485543	13487935	.	0	+
I	13695787	13696896	.	0	+
I	13700538	13700792	.	0	+
I	13784223	13784780	.	0	+
I	13816579	13818298	.	0	+
I	13845538	13846944	.	0	+
I	13904875	13906277	.	0	+
I	13907775	13909082	.	0	+
I	13910247	13911450	.	0	+
I	13912257	13912741	.	0	+
I	13916865	13917430	.	0	+
I	13953993	13955704	.	0	+
I	13990333	13992179	.	0	+
I	14002347	14002683	.	0	+
I	14075974	14076346	.	0	+
I	14091363	14091689	.	0	+
I	14103126	14104011	.	0	+
I	14129953	14130884	.	0	+
I	14131455	14131821	.	0	+
I	14159467	14160362	.	0	+
I	14187082	14188225	.	0	+
I	14206397	14208355	.	0	+
I	14246372	14246682	.	0	+
I	14247739	14248297	.	0	+
I	14273034	14273981	.	0	+
I	14307783	14308569	.	0	+
I	14322291	14322841	.	0	+
I	14327095	14327777	.	0	+
I	14328360	14328966	.	0	+
I	14337091	14337280	.	0	+
I	14381484	14382300	.	0	+
I	14444879	14445366	.	0	+
I	14499826	14500123	.	0	+
I	14623865	14624366	.	0	+
I	14624418	14624837	.	0	+
I	14731413	14732329	.	0	+
I	14804703	14805256	.	0	+
I	14846969	14848261	.	0	+
I	14856212	14857659	.	0	+
I	14857674	14860569	.	0	+
I	14860669	14861742	.	0	+
I	14882485	14882613	.	0	+
I	14889885	14890308	.	0	+
I	14893061	14893766	.	0	+
I	14908971	14909475	.	0	+
I	14996317	14998044	.	0	+
I	15064961	15065865	.	0	+
II	193166	193953	.	0	+
II	416972	417894	.	0	+
II	437385	437882	.	0	+
II	551257	551686	.	0	+
II	643429	644476	.	0	+
II	712883	713361	.	0	+
II	714298	715220	.	0	+
II	716308	716968	.	0	+
II	812612	813340	.	0	+
II	813473	813741	.	0	+
II	845892	846335	.	0	+
II	875624	876637	.	0	+
II	876865	877351	.	0	+
II	892162	892755	.	0	+
II	905270	906059	.	0	+
II	921502	922564	.	0	+
II	960084	960673	.	0	+
II	998423	998547	.	0	+
II	1105025	1105636	.	0	+
II	1146005	1146255	.	0	+
II	1146913	1147028	.	0	+
II	1148794	1149086	.	0	+
II	1149503	1149818	.	0	+
II	1151247	1151531	.	0	+
II	1226907	1227543	.	0	+
II	1236455	1236940	.	0	+
II	1284740	1285576	.	0	+
II	1444088	1445018	.	0	+
II	1578183	1580088	.	0	+
II	1594040	1594875	.	0	+
II	1644164	1645959	.	0	+
II	1666333	1666676	.	0	+
II	1672616	1673058	.	0	+
II	1732570	1732928	.	0	+
II	1929801	1930036	.	0	+
II	1930040	1930442	.	0	+
II	2035180	2036088	.	0	+
II	2052438	2053217	.	0	+
II	2163337	2164083	.	0	+
II	2215406	2215934	.	0	+
II	2216029	2217675	.	0	+
II	2218010	2219382	.	0	+
II	2220609	2220817	.	0	+
II	2221095	2221825	.	0	+
II	2446302	2446637	.	0	+
II	2447409	2447922	.	0	+
II	2516620	2516998	.	0	+
II	2519194	2519637	.	0	+
II	2525357	2526339	.	0	+
II	2553383	2554551	.	0	+
II	2555616	2556195	.	0	+
II	2559095	2560021	.	0	+
II	2561162	2562417	.	0	+
II	2631251	2631960	.	0	+
II	2662704	2663419	.	0	+
II	2731255	2732634	.	0	+
II	2732727	2732921	.	0	+
II	2736075	2737435	.	0	+
II	2741185	2742226	.	0	+
II	2783169	2784019	.	0	+
II	2785507	2786747	.	0	+
II	2795827	2796806	.	0	+
II	2827732	2828773	.	0	+
II	2841244	2842078	.	0	+
II	2845737	2846237	.	0	+
II	2847300	2848490	.	0	+
II	2848546	2850366	.	0	+
II	2920426	2920926	.	0	+
II	2925442	2926272	.	0	+
II	2929845	2930360	.	0	+
II	2945223	2946023	.	0	+
II	2953685	2954778	.	0	+
II	2985323	2985640	.	0	+
II	2987841	2989108	.	0	+
II	2989469	2990011	.	0	+
II	2999152	3000623	.	0	+
II	3000801	3001182	.	0	+
II	3003070	3003665	.	0	+
II	3004659	3007561	.	0	+
II	3048979	3050033	.	0	+
II	3052474	3054242	.	0	+
II	3054501	3056118	.	0	+
II	3061042	3062290	.	0	+
II	3107831	3110616	.	0	+
II	3121926	3122341	.	0	+
II	3130602	3131172	.	0	+
II	3153640	3154101	.	0	+
II	3185764	3186172	.	0	+
II	3193634	3194436	.	0	+
II	3249787	3250561	.	0	+
II	3278467	3280816	.	0	+
II	3286121	3286873	.	0	+
II	3358802	3359804	.	0	+
II	3369857	3370597	.	0	+
II	3382107	3382644	.	0	+
II	3423460	3424611	.	0	+
II	3431620	3432218	.	0	+
II	3432440	3432670	.	0	+
II	3432837	3433182	.	0	+
II	3433926	3434652	.	0	+
II	3438523	3438998	.	0	+
II	3457539	3458326	.	0	+
II	3464605	3466406	.	0	+
II	3468924	3470588	.	0	+
II	3500538	3502361	.	0	+
II	3519697	3521042	.	0	+
II	3525979	3526834	.	0	+
II	3578573	3579123	.	0	+
II	3604732	3604792	.	0	+
II	3629452	3629592	.	0	+
II	3641591	3642115	.	0	+
II	3656648	3657238	.	0	+
II	3675575	3676769	.	0	+
II	3722241	3722330	.	0	+
II	3786069	3786204	.	0	+
II	3798388	3799167	.	0	+
II	3937294	3937761	.	0	+
II	3964506	3965218	.	0	+
II	3966755	3968460	.	0	+
II	3968926	3969144	.	0	+
II	4186566	4188284	.	0	+
II	4190256	4190875	.	0	+
II	4204964	4205409	.	0	+
II	4372222	4373285	.	0	+
II	4428348	4428558	.	0	+
II	4520654	4521676	.	0	+
II	4589900	4590133	.	0	+
II	4673102	4673758	.	0	+
II	4785597	4786178	.	0	+
II	4865517	4867417	.	0	+
II	4869461	4870415	.	0	+
II	4871621	4872963	.	0	+
II	4931374	4931628	.	0	+
II	5219576	5220135	.	0	+
II	5796886	5797396	.	0	+
II	5798028	5798639	.	0	+
II	6481859	6482342	.	0	+
II	6490467	6490597	.	0	+
II	6677977	6678146	.	0	+
II	6818669	6818826	.	0	+
II	6968116	6968743	.	0	+
II	7153139	7153524	.	0	+
II	7154418	7155015	.	0	+
II	7447661	7447718	.	0	+
II	7864989	7865061	.	0	+
II	7892616	7893417	.	0	+
II	8287113	8287520	.	0	+
II	8357972	8359812	.	0	+
II	8450969	8452279	.	0	+
II	8498707	8499454	.	0	+
II	8877003	8877447	.	0	+
II	9058044	9058421	.	0	+
II	9062427	9062639	.	0	+
II	9673518	9673722	.	0	+
II	9697235	9697556	.	0	+
II	10013528	10015428	.	0	+
II	10548746	10548839	.	0	+
II	10705002	10706065	.	0	+
II	10706922	10708682	.	0	+
II	10710197	10710787	.	0	+
II	10933630	10934062	.	0	+
II	10939761	10941023	.	0	+
II	11012192	11013231	.	0	+
II	11015142	11016569	.	0	+
II	11040194	11040527	.	0	+
II	11210786	11211299	.	0	+
II	11211444	11213182	.	0	+
II	11213373	11214340	.	0	+
II	11270583	11271175	.	0	+
II	11286587	11286896	.	0	+
II	11301404	11301525	.	0	+
II	11336404	11337516	.	0	+
II	11455509	11455576	.	0	+
II	11542840	11543720	.	0	+
II	11655713	11655821	.	0	+
II	11698879	11699028	.	0	+
II	11699178	11699487	.	0	+
II	11708742	11709158	.	0	+
II	11725515	11726320	.	0	+
II	11729570	11730532	.	0	+
II	11746504	11748423	.	0	+
II	11790413	11791520	.	0	+
II	11822916	11823144	.	0	+
II	11841713	11842175	.	0	+
II	11957717	11958527	.	0	+
II	11960180	11960534	.	0	+
II	11961343	11962050	.	0	+
II	11970225	11970766	.	0	+
II	11972192	11972997	.	0	+
II	12051020	12051678	.	0	+
II	12079477	12079924	.	0	+
II	12212120	12212295	.	0	+
II	12214346	12214829	.	0	+
II	12215541	12216190	.	0	+
II	12226292	12226353	.	0	+
II	12264062	12264589	.	0	+
II	12264598	12265581	.	0	+
II	12283053	12283538	.	0	+
II	12301352	12302363	.	0	+
II	12343036	12343320	.	0	+
II	12365149	12366788	.	0	+
II	12445334	12446366	.	0	+
II	12455821	12456452	.	0	+
II	12479608	12479989	.	0	+
II	12491902	12492162	.	0	+
II	12523490	12524422	.	0	+
II	12607279	12608244	.	0	+
II	12633003	12633845	.	0	+
II	12666608	12669243	.	0	+
II	12715587	12716448	.	0	+
II	12735852	12735994	.	0	+
II	12743131	12743940	.	0	+
II	12767339	12767621	.	0	+
II	12774928	12776156	.	0	+
II	12786666	12787669	.	0	+
II	12862208	12863264	.	0	+
II	12865161	12865684	.	0	+
II	12881065	12882030	.	0	+
II	12948054	12949131	.	0	+
II	12951881	12953127	.	0	+
II	13059150	13061135	.	0	+
II	13096247	13096716	.	0	+
II	13108554	13110008	.	0	+
II	13151929	13153287	.	0	+
II	13170572	13171543	.	0	+
II	13183678	13184766	.	0	+
II	13198105	13198943	.	0	+
II	13211869	13212860	.	0	+
II	13289936	13291787	.	0	+
II	13313964	13314854	.	0	+
II	13334833	13335962	.	0	+
II	13341141	13341802	.	0	+
II	13345163	13346093	.	0	+
II	13416453	13417153	.	0	+
II	13418519	13419416	.	0	+
II	13482781	13483089	.	0	+
II	13483753	13484759	.	0	+
II	13485313	13487548	.	0	+
II	13487687	13488258	.	0	+
II	13489902	13490617	.	0	+
II	13511957	13512015	.	0	+
II	13522899	13523476	.	0	+
II	13525831	13526167	.	0	+
II	13527034	13528158	.	0	+
II	13529043	13529636	.	0	+
II	13530570	13531152	.	0	+
II	13535002	13535805	.	0	+
II	13538662	13539709	.	0	+
II	13560503	13560966	.	0	+
II	13647252	13648332	.	0	+
II	13692643	13693176	.	0	+
II	13693198	13693395	.	0	+
II	13727296	13728075	.	0	+
II	13750927	13751326	.	0	+
II	13814924	13815436	.	0	+
II	13828255	13828543	.	0	+
II	13854867	13856324	.	0	+
II	13860525	13860584	.	0	+
II	13872911	13873280	.	0	+
II	13886477	13887159	.	0	+
II	13890679	13891242	.	0	+
II	13894996	13896379	.	0	+
II	13938039	13938944	.	0	+
II	13961031	13962053	.	0	+
II	13967534	13968676	.	0	+
II	13972209	13972564	.	0	+
II	14004418	14005216	.	0	+
II	14034299	14036416	.	0	+
II	14060227	14060583	.	0	+
II	14074976	14075158	.	0	+
II	14077272	14078226	.	0	+
II	14082707	14083423	.	0	+
II	14090128	14092305	.	0	+
II	14115712	14117286	.	0	+
II	14131518	14132664	.	0	+
II	14138852	14139987	.	0	+
II	14165341	14165624	.	0	+
II	14165933	14166559	.	0	+
II	14174181	14175409	.	0	+
II	14215456	14216627	.	0	+
II	14231417	14231955	.	0	+
II	14236888	14237803	.	0	+
II	14317994	14319217	.	0	+
II	14322610	14323074	.	0	+
II	14360530	14361076	.	0	+
II	14491947	14492322	.	0	+
II	14656575	14659024	.	0	+
II	14661437	14662857	.	0	+
II	14663078	14666202	.	0	+
II	14676142	14676824	.	0	+
II	14707857	14708634	.	0	+
II	14709879	14710267	.	0	+
II	14735426	14735777	.	0	+
II	14760167	14760711	.	0	+
II	14769647	14769932	.	0	+
II	14770710	14772319	.	0	+
II	14772373	14772669	.	0	+
II	14793165	14793476	.	0	+
II	14986695	14986975	.	0	+
II	15002394	15002986	.	0	+
II	15005065	15005553	.	0	+
II	15039992	15040622	.	0	+
II	15043031	15044528	.	0	+
II	15055619	15058840	.	0	+
II	15088947	15089461	.	0	+
II	15152678	15154081	.	0	+
II	15216195	15216634	.	0	+
II	15218119	15218313	.	0	+
II	15232183	15232631	.	0	+
II	15235577	15235854	.	0	+
II	15241942	15242272	.	0	+
II	15273009	15273765	.	0	+
III	21240	22622	.	0	+
III	41310	42895	.	0	+
III	48817	50259	.	0	+
III	52473	53810	.	0	+
III	63346	64367	.	0	+
III	64707	65563	.	0	+
III	65684	66061	.	0	+
III	115845	116448	.	0	+
III	117887	118566	.	0	+
III	159855	160404	.	0	+
III	174650	175857	.	0	+
III	296250	296678	.	0	+
III	351869	353025	.	0	+
III	368367	369199	.	0	+
III	372116	373555	.	0	+
III	398478	398965	.	0	+
III	505745	510316	.	0	+
III	595388	595859	.	0	+
III	633478	633610	.	0	+
III	662802	663315	.	0	+
III	693988	694544	.	0	+
III	732467	733337	.	0	+
III	735015	735821	.	0	+
III	742300	743047	.	0	+
III	812631	813198	.	0	+
III	823280	824231	.	0	+
III	853451	853622	.	0	+
III	938253	938686	.	0	+
III	941961	942687	.	0	+
III	947523	947631	.	0	+
III	964978	965800	.	0	+
III	1040241	1040713	.	0	+
III	1051858	1052673	.	0	+
III	1064665	1064999	.	0	+
III	1087285	1088417	.	0	+
III	1171848	1172986	.	0	+
III	1209993	1211429	.	0	+
III	1420045	1420289	.	0	+
III	1425192	1425420	.	0	+
III	1437590	1438536	.	0	+
III	1503668	1504216	.	0	+
III	1683984	1684623	.	0	+
III	1686640	1687323	.	0	+
III	1719492	1719988	.	0	+
III	1759020	1759973	.	0	+
III	1799689	1800482	.	0	+
III	1803309	1805614	.	0	+
III	1808107	1808906	.	0	+
III	1813855	1814719	.	0	+
III	1888384	1889069	.	0	+
III	1924015	1924333	.	0	+
III	1966970	1967701	.	0	+
III	1973428	1973652	.	0	+
III	1975665	1977476	.	0	+
III	2008124	2008899	.	0	+
III	2011468	2012441	.	0	+
III	2012908	2014670	.	0	+
III	2121563	2122006	.	0	+
III	2197908	2201204	.	0	+
III	2424848	2425514	.	0	+
III	2514466	2515601	.	0	+
III	2535066	2535604	.	0	+
III	2563168	2563759	.	0	+
III	2591115	2591251	.	0	+
III	2659419	2659701	.	0	+
III	2663354	2663837	.	0	+
III	2667024	2668366	.	0	+
III	2669023	2669234	.	0	+
III	2672169	2672564	.	0	+
III	2679254	2679627	.	0	+
III	2712542	2712904	.	0	+
III	2747075	2747405	.	0	+
III	2747518	2747903	.	0	+
III	2778538	2778728	.	0	+
III	2778742	2778887	.	0	+
III	2867943	2868513	.	0	+
III	2917476	2917945	.	0	+
III	2927880	2928346	.	0	+
III	2930054	2932048	.	0	+
III	2939676	2941326	.	0	+
III	3012229	3012533	.	0	+
III	3013123	3013439	.	0	+
III	3019939	3022506	.	0	+
III	3026836	3027654	.	0	+
III	3054770	3055501	.	0	+
III	3098371	3099036	.	0	+
III	3169046	3169963	.	0	+
III	3273350	3274133	.	0	+
III	3274904	3275356	.	0	+
III	3339157	3339641	.	0	+
III	3346501	3347243	.	0	+
III	3380395	3381012	.	0	+
III	3442610	3443903	.	0	+
III	3444857	3447825	.	0	+
III	3522037	3522292	.	0	+
III	3621604	3622443	.	0	+
III	3623707	3624265	.	0	+
III	3737883	3738205	.	0	+
III	3896267	3896717	.	0	+
III	4060942	4061628	.	0	+
III	4280749	4281300	.	0	+
III	4400251	4400652	.	0	+
III	4748662	4749099	.	0	+
III	5107329	5107737	.	0	+
III	5108007	5108232	.	0	+
III	5172547	5172593	.	0	+
III	5337233	5338092	.	0	+
III	5479747	5480425	.	0	+
III	5503336	5503662	.	0	+
III	5504822	5505016	.	0	+
III	5694902	5695045	.	0	+
III	5712224	5712350	.	0	+
III	5953929	5954448	.	0	+
III	6648404	6649116	.	0	+
III	6792267	6792757	.	0	+
III	7102719	7103303	.	0	+
III	7670195	7671184	.	0	+
III	7712737	7713384	.	0	+
III	8262090	8263160	.	0	+
III	8815749	8816073	.	0	+
III	8863109	8863308	.	0	+
III	8863859	8864025	.	0	+
III	8872889	8873552	.	0	+
III	8935486	8936177	.	0	+
III	8962336	8962928	.	0	+
III	8964539	8964873	.	0	+
III	9080262	9083203	.	0	+
III	9111608	9113118	.	0	+
III	9338283	9341131	.	0	+
III	9353417	9355160	.	0	+
III	9457287	9457763	.	0	+
III	9759720	9759818	.	0	+
III	10142698	10143105	.	0	+
III	10253358	10253564	.	0	+
III	10260551	10260991	.	0	+
III	10326014	10326492	.	0	+
III	10327769	10327996	.	0	+
III	10394572	10395373	.	0	+
III	10398393	10400681	.	0	+
III	10436549	10437172	.	0	+
III	10455129	10455688	.	0	+
III	10520428	10520895	.	0	+
III	10591372	10592410	.	0	+
III	10659868	10660543	.	0	+
III	10674612	10674891	.	0	+
III	10676588	10677602	.	0	+
III	10742021	10742303	.	0	+
III	10750143	10750946	.	0	+
III	10810115	10810350	.	0	+
III	10814925	10815227	.	0	+
III	10892588	10893367	.	0	+
III	10939241	10940197	.	0	+
III	10956714	10956997	.	0	+
III	10962826	10963593	.	0	+
III	10964406	10964959	.	0	+
III	10965465	10967831	.	0	+
III	10969135	10969683	.	0	+
III	10984821	10985230	.	0	+
III	11064001	11064724	.	0	+
III	11065117	11065568	.	0	+
III	11065730	11066535	.	0	+
III	11068556	11069589	.	0	+
III	11143322	11143888	.	0	+
III	11216216	11217853	.	0	+
III	11286896	11287452	.	0	+
III	11338922	11340075	.	0	+
III	11364846	11365517	.	0	+
III	11373195	11375937	.	0	+
III	11466454	11466700	.	0	+
III	11477070	11479002	.	0	+
III	11497466	11497917	.	0	+
III	11498950	11499394	.	0	+
III	11506422	11507017	.	0	+
III	11510590	11511340	.	0	+
III	11561207	11562002	.	0	+
III	11564899	11565269	.	0	+
III	11571269	11571499	.	0	+
III	11579472	11579699	.	0	+
III	11611063	11611805	.	0	+
III	11613556	11614287	.	0	+
III	11659703	11660941	.	0	+
III	11698356	11698419	.	0	+
III	11704366	11704904	.	0	+
III	11705729	11706556	.	0	+
III	11730806	11732271	.	0	+
III	11732474	11732732	.	0	+
III	11816745	11818315	.	0	+
III	11833160	11834007	.	0	+
III	11848398	11848950	.	0	+
III	11853472	11854231	.	0	+
III	11855236	11856941	.	0	+
III	11899441	11900086	.	0	+
III	11902729	11903182	.	0	+
III	11936510	11938435	.	0	+
III	11977234	11977358	.	0	+
III	11978276	11978781	.	0	+
III	11981508	11982646	.	0	+
III	12062998	12063533	.	0	+
III	12149862	12150589	.	0	+
III	12156684	12157361	.	0	+
III	12167508	12167670	.	0	+
III	12208278	12208459	.	0	+
III	12245652	12246072	.	0	+
III	12367577	12368592	.	0	+
III	12393006	12393521	.	0	+
III	12438993	12439318	.	0	+
III	12488218	12488961	.	0	+
III	12562594	12563096	.	0	+
III	12564944	12566240	.	0	+
III	12613094	12613981	.	0	+
III	12762989	12763545	.	0	+
III	12788243	12788736	.	0	+
III	12868851	12869516	.	0	+
III	12878121	12879098	.	0	+
III	12879758	12880297	.	0	+
III	12881483	12881742	.	0	+
III	12883119	12883386	.	0	+
III	12883602	12885605	.	0	+
III	12910517	12911039	.	0	+
III	12951134	12951754	.	0	+
III	12986690	12987414	.	0	+
III	12992662	12993226	.	0	+
III	13071951	13072232	.	0	+
III	13090965	13093467	.	0	+
III	13206149	13207326	.	0	+
III	13234971	13236643	.	0	+
III	13236912	13237749	.	0	+
III	13241869	13243308	.	0	+
III	13315561	13317492	.	0	+
III	13518433	13519211	.	0	+
III	13563097	13564009	.	0	+
III	13564163	13566012	.	0	+
III	13580041	13581268	.	0	+
III	13605156	13605278	.	0	+
III	13615297	13616064	.	0	+
III	13618377	13618842	.	0	+
III	13619211	13620445	.	0	+
III	13645846	13646667	.	0	+
III	13653949	13654850	.	0	+
III	13727327	13727492	.	0	+
IV	139573	139993	.	0	+
IV	140656	141406	.	0	+
IV	147691	147825	.	0	+
IV	147963	148125	.	0	+
IV	227982	228753	.	0	+
IV	325554	326109	.	0	+
IV	406395	406493	.	0	+
IV	426644	426895	.	0	+
IV	467769	468753	.	0	+
IV	504811	505461	.	0	+
IV	505607	505800	.	0	+
IV	506181	506742	.	0	+
IV	604564	606055	.	0	+
IV	618479	619390	.	0	+
IV	762814	763508	.	0	+
IV	790313	790674	.	0	+
IV	849526	850154	.	0	+
IV	868491	869085	.	0	+
IV	914076	915814	.	0	+
IV	918797	919157	.	0	+
IV	934164	935124	.	0	+
IV	1013331	1013400	.	0	+
IV	1058655	1059297	.	0	+
IV	1102844	1104473	.	0	+
IV	1126564	1126819	.	0	+
IV	1199738	1200475	.	0	+
IV	1209668	1210348	.	0	+
IV	1357826	1358764	.	0	+
IV	1360020	1362135	.	0	+
IV	1373884	1374534	.	0	+
IV	1443887	1444655	.	0	+
IV	1447302	1448699	.	0	+
IV	1459278	1460273	.	0	+
IV	1461314	1462665	.	0	+
IV	1512985	1514442	.	0	+
IV	1546311	1546637	.	0	+
IV	1548960	1549485	.	0	+
IV	1580471	1580853	.	0	+
IV	1710566	1710723	.	0	+
IV	1713599	1713935	.	0	+
IV	1721124	1721926	.	0	+
IV	1731326	1731426	.	0	+
IV	1752568	1752872	.	0	+
IV	1760836	1761826	.	0	+
IV	1768883	1769364	.	0	+
IV	1781206	1782143	.	0	+
IV	1805249	1806147	.	0	+
IV	1818712	1819275	.	0	+
IV	1833364	1834006	.	0	+
IV	1877188	1877585	.	0	+
IV	1914306	1914448	.	0	+
IV	1914625	1915284	.	0	+
IV	1943635	1944079	.	0	+
IV	1971481	1971715	.	0	+
IV	1982302	1982694	.	0	+
IV	1983409	1983853	.	0	+
IV	1984218	1984767	.	0	+
IV	1990608	1991034	.	0	+
IV	2037618	2038019	.	0	+
IV	2083821	2084475	.	0	+
IV	2087085	2087254	.	0	+
IV	2089376	2090463	.	0	+
IV	2188146	2188475	.	0	+
IV	2216275	2216504	.	0	+
IV	2236455	2238309	.	0	+
IV	2277363	2278475	.	0	+
IV	2407981	2409525	.	0	+
IV	2489621	2490307	.	0	+
IV	2602682	2603347	.	0	+
IV	2611680	2612216	.	0	+
IV	2650666	2650990	.	0	+
IV	2652884	2654840	.	0	+
IV	2657222	2658732	.	0	+
IV	2706261	2710382	.	0	+
IV	2807297	2808923	.	0	+
IV	2888512	2888838	.	0	+
IV	2936644	2937096	.	0	+
IV	2968032	2969234	.	0	+
IV	2995143	2995750	.	0	+
IV	2996994	2997603	.	0	+
IV	3012117	3012809	.	0	+
IV	3026287	3027840	.	0	+
IV	3030265	3030917	.	0	+
IV	3041256	3041544	.	0	+
IV	3045027	3045252	.	0	+
IV	3062773	3063076	.	0	+
IV	3100879	3101451	.	0	+
IV	3203186	3203405	.	0	+
IV	3205473	3206258	.	0	+
IV	3254151	3254425	.	0	+
IV	3276224	3277010	.	0	+
IV	3283342	3283856	.	0	+
IV	3284034	3284269	.	0	+
IV	3299044	3299627	.	0	+
IV	3321202	3321746	.	0	+
IV	3337818	3338541	.	0	+
IV	3346425	3346632	.	0	+
IV	3439656	3440281	.	0	+
IV	3523739	3525469	.	0	+
IV	3585962	3586437	.	0	+
IV	3591089	3591402	.	0	+
IV	3605478	3605684	.	0	+
IV	3615764	3616742	.	0	+
IV	3618485	3619435	.	0	+
IV	3686112	3686753	.	0	+
IV	3699294	3699850	.	0	+
IV	3731345	3732471	.	0	+
IV	3739923	3740213	.	0	+
IV	3745690	3745853	.	0	+
IV	3795717	3796168	.	0	+
IV	3797266	3797856	.	0	+
IV	3797929	3798694	.	0	+
IV	3837346	3838076	.	0	+
IV	3859639	3859863	.	0	+
IV	3873153	3873466	.	0	+
IV	3934500	3934690	.	0	+
IV	3999028	4000178	.	0	+
IV	4001086	4002451	.	0	+
IV	4003198	4003946	.	0	+
IV	4003988	4004603	.	0	+
IV	4009597	4010459	.	0	+
IV	4011148	4012090	.	0	+
IV	4012099	4013131	.	0	+
IV	4016841	4017053	.	0	+
IV	4039965	4040776	.	0	+
IV	4040936	4042103	.	0	+
IV	4048461	4048597	.	0	+
IV	4076966	4077417	.	0	+
IV	4128902	4129078	.	0	+
IV	4129261	4129849	.	0	+
IV	4162454	4163111	.	0	+
IV	4163943	4164374	.	0	+
IV	4165135	4165362	.	0	+
IV	4167838	4168270	.	0	+
IV	4169077	4169653	.	0	+
IV	4235006	4236889	.	0	+
IV	4243665	4244970	.	0	+
IV	4254615	4254904	.	0	+
IV	4264488	4265367	.	0	+
IV	4309911	4310528	.	0	+
IV	4313987	4314281	.	0	+
IV	4346549	4347767	.	0	+
IV	4383211	4383270	.	0	+
IV	4515257	4517359	.	0	+
IV	4521749	4522536	.	0	+
IV	4655656	4656357	.	0	+
IV	4658533	4659116	.	0	+
IV	4701516	4701843	.	0	+
IV	4768501	4769238	.	0	+
IV	4769654	4769846	.	0	+
IV	4783976	4784465	.	0	+
IV	5016690	5017469	.	0	+
IV	5468686	5470654	.	0	+
IV	5474950	5475176	.	0	+
IV	5657217	5658454	.	0	+
IV	5685544	5687529	.	0	+
IV	5890453	5892291	.	0	+
IV	5985161	5986164	.	0	+
IV	6001997	6002493	.	0	+
IV	6005270	6006147	.	0	+
IV	6012351	6012910	.	0	+
IV	6377361	6377982	.	0	+
IV	7112067	7112593	.	0	+
IV	7145729	7146645	.	0	+
IV	7727193	7727820	.	0	+
IV	7734702	7735201	.	0	+
IV	7736010	7736300	.	0	+
IV	7754145	7755164	.	0	+
IV	7845392	7846072	.	0	+
IV	7874377	7874657	.	0	+
IV	7925891	7926108	.	0	+
IV	8262226	8263193	.	0	+
IV	8263706	8264237	.	0	+
IV	8289170	8289303	.	0	+
IV	8302123	8302346	.	0	+
IV	8333831	8334746	.	0	+
IV	8345808	8346555	.	0	+
IV	8499422	8499971	.	0	+
IV	8978936	8980262	.	0	+
IV	9549505	9550157	.	0	+
IV	9551757	9552376	.	0	+
IV	9554402	9555070	.	0	+
IV	9555257	9556226	.	0	+
IV	9563375	9564384	.	0	+
IV	9822117	9822610	.	0	+
IV	9914978	9916194	.	0	+
IV	10215579	10217572	.	0	+
IV	10503672	10505362	.	0	+
IV	10553558	10553670	.	0	+
IV	10816951	10818041	.	0	+
IV	11163412	11163924	.	0	+
IV	11418711	11419519	.	0	+
IV	11479725	11480245	.	0	+
IV	11564870	11565311	.	0	+
IV	11583420	11584434	.	0	+
IV	11787386	11787675	.	0	+
IV	11831545	11832572	.	0	+
IV	11979520	11979824	.	0	+
IV	11982006	11982579	.	0	+
IV	12006880	12007289	.	0	+
IV	12108474	12109447	.	0	+
IV	12524495	12525074	.	0	+
IV	12743735	12744382	.	0	+
IV	12855970	12856389	.	0	+
IV	13023762	13024402	.	0	+
IV	13065946	13066305	.	0	+
IV	13088970	13089290	.	0	+
IV	13089398	13090304	.	0	+
IV	13202982	13203724	.	0	+
IV	13329852	13331142	.	0	+
IV	13332765	13333547	.	0	+
IV	13395219	13395827	.	0	+
IV	13430491	13432011	.	0	+
IV	13884122	13885063	.	0	+
IV	14098576	14099389	.	0	+
IV	14216643	14217756	.	0	+
IV	14255429	14256933	.	0	+
IV	14517721	14518032	.	0	+
IV	14532168	14532905	.	0	+
IV	14773163	14774461	.	0	+
IV	15039147	15039306	.	0	+
IV	15045299	15045476	.	0	+
IV	15059065	15061227	.	0	+
IV	15129371	15131108	.	0	+
IV	15375248	15376168	.	0	+
IV	15599730	15600552	.	0	+
IV	15718028	15719404	.	0	+
IV	15824097	15824797	.	0	+
IV	15853403	15854356	.	0	+
IV	15938083	15939206	.	0	+
IV	15999749	16000834	.	0	+
IV	16159983	16160978	.	0	+
IV	16161863	16162416	.	0	+
IV	16168753	16170508	.	0	+
IV	16233951	16234149	.	0	+
IV	16493297	16494903	.	0	+
IV	16551529	16551917	.	0	+
IV	16601592	16602327	.	0	+
IV	16653471	16654941	.	0	+
IV	16776603	16779013	.	0	+
IV	16826365	16826770	.	0	+
IV	16868121	16868903	.	0	+
IV	16934345	16936480	.	0	+
IV	16950730	16951028	.	0	+
IV	16962302	16962809	.	0	+
IV	17116901	17117169	.	0	+
IV	17258085	17258399	.	0	+
IV	17280993	17281256	.	0	+
IV	17490389	17491032	.	0	+
V	10980	11330	.	0	+
V	36507	37134	.	0	+
V	67910	68606	.	0	+
V	138207	138560	.	0	+
V	139813	140119	.	0	+
V	164325	165983	.	0	+
V	192957	195363	.	0	+
V	199159	199499	.	0	+
V	237167	237874	.	0	+
V	345233	345747	.	0	+
V	354950	355306	.	0	+
V	368009	368391	.	0	+
V	461023	461290	.	0	+
V	506685	507333	.	0	+
V	533628	533918	.	0	+
V	559939	560267	.	0	+
V	724575	725552	.	0	+
V	764366	764556	.	0	+
V	792187	793082	.	0	+
V	793221	797012	.	0	+
V	801754	803281	.	0	+
V	853833	854401	.	0	+
V	926563	927195	.	0	+
V	940114	941139	.	0	+
V	1009032	1009281	.	0	+
V	1065422	1066256	.	0	+
V	1150394	1151981	.	0	+
V	1199446	1201053	.	0	+
V	1204931	1205520	.	0	+
V	1232648	1234065	.	0	+
V	1289585	1290288	.	0	+
V	1341776	1343846	.	0	+
V	1367233	1369001	.	0	+
V	1373497	1374082	.	0	+
V	1374877	1375418	.	0	+
V	1378000	1378629	.	0	+
V	1379612	1380533	.	0	+
V	1424164	1424693	.	0	+
V	1465081	1466619	.	0	+
V	1583093	1583496	.	0	+
V	1588331	1589087	.	0	+
V	1658903	1659586	.	0	+
V	1688159	1689121	.	0	+
V	1689135	1689655	.	0	+
V	1692301	1692513	.	0	+
V	1698524	1699677	.	0	+
V	1774010	1774683	.	0	+
V	1812073	1812411	.	0	+
V	1822883	1823598	.	0	+
V	1873773	1874021	.	0	+
V	1874354	1875179	.	0	+
V	1899588	1900411	.	0	+
V	1912368	1913073	.	0	+
V	1991287	1992019	.	0	+
V	2073172	2073619	.	0	+
V	2076257	2076783	.	0	+
V	2090783	2091406	.	0	+
V	2097308	2098452	.	0	+
V	2183761	2184128	.	0	+
V	2201795	2202285	.	0	+
V	2272504	2274127	.	0	+
V	2595824	2596140	.	0	+
V	2617546	2619309	.	0	+
V	2639318	2639858	.	0	+
V	2646117	2646211	.	0	+
V	2648353	2649097	.	0	+
V	2650615	2651731	.	0	+
V	2651842	2653536	.	0	+
V	2663084	2663574	.	0	+
V	2668199	2668654	.	0	+
V	2685165	2685940	.	0	+
V	2702924	2703866	.	0	+
V	2757156	2758016	.	0	+
V	2782896	2784326	.	0	+
V	2784895	2786335	.	0	+
V	2786569	2788276	.	0	+
V	2788603	2790060	.	0	+
V	2790296	2791840	.	0	+
V	2795450	2796049	.	0	+
V	2796867	2797681	.	0	+
V	2798168	2798858	.	0	+
V	2799131	2804249	.	0	+
V	2806187	2807313	.	0	+
V	3131484	3133104	.	0	+
V	3134761	3136015	.	0	+
V	3162193	3163382	.	0	+
V	3188135	3189644	.	0	+
V	3210071	3210470	.	0	+
V	3273286	3274643	.	0	+
V	3310427	3311431	.	0	+
V	3313908	3314585	.	0	+
V	3341988	3342689	.	0	+
V	3388692	3390265	.	0	+
V	3443342	3443825	.	0	+
V	3454584	3456642	.	0	+
V	3574795	3575864	.	0	+
V	3582625	3583183	.	0	+
V	3584106	3584500	.	0	+
V	3612987	3613593	.	0	+
V	3665885	3666716	.	0	+
V	3683409	3684132	.	0	+
V	3705773	3706835	.	0	+
V	3710593	3711183	.	0	+
V	3727953	3729486	.	0	+
V	3751925	3752466	.	0	+
V	3757980	3758477	.	0	+
V	3790386	3790776	.	0	+
V	4115052	4115582	.	0	+
V	4119729	4120280	.	0	+
V	4284284	4285136	.	0	+
V	4375227	4376424	.	0	+
V	4412806	4413393	.	0	+
V	4431897	4432341	.	0	+
V	4499460	4500619	.	0	+
V	4503330	4505246	.	0	+
V	4526734	4527576	.	0	+
V	4578647	4579948	.	0	+
V	4599214	4599468	.	0	+
V	4652887	4653823	.	0	+
V	4694306	4694683	.	0	+
V	4695357	4696234	.	0	+
V	4754617	4755332	.	0	+
V	4757795	4758401	.	0	+
V	5005885	5007994	.	0	+
V	5163108	5163770	.	0	+
V	5179773	5181139	.	0	+
V	5182272	5184121	.	0	+
V	5186431	5187209	.	0	+
V	5187695	5189163	.	0	+
V	5319389	5320072	.	0	+
V	5668508	5668777	.	0	+
V	5718609	5719271	.	0	+
V	5720968	5721074	.	0	+
V	5755021	5756078	.	0	+
V	5780075	5780745	.	0	+
V	5799431	5800260	.	0	+
V	5834283	5836723	.	0	+
V	5843709	5844291	.	0	+
V	6126725	6127520	.	0	+
V	6204066	6204464	.	0	+
V	6703253	6703784	.	0	+
V	6764092	6764398	.	0	+
V	6768043	6768932	.	0	+
V	6829888	6830859	.	0	+
V	6831266	6831962	.	0	+
V	6879363	6880439	.	0	+
V	7106478	7107300	.	0	+
V	7511193	7511461	.	0	+
V	7745723	7746400	.	0	+
V	7832087	7832602	.	0	+
V	8481788	8482182	.	0	+
V	8483789	8484957	.	0	+
V	8620091	8621071	.	0	+
V	8653747	8654083	.	0	+
V	8802229	8802772	.	0	+
V	9162076	9162754	.	0	+
V	9177323	9177642	.	0	+
V	9620210	9620951	.	0	+
V	9621928	9623197	.	0	+
V	9957814	9958154	.	0	+
V	9970393	9970942	.	0	+
V	10291852	10292033	.	0	+
V	10393891	10393931	.	0	+
V	10393978	10394540	.	0	+
V	10420942	10421177	.	0	+
V	10424060	10424295	.	0	+
V	10456681	10457233	.	0	+
V	10866176	10867071	.	0	+
V	11480785	11481016	.	0	+
V	11705463	11705969	.	0	+
V	12023808	12024768	.	0	+
V	12166928	12167544	.	0	+
V	12227482	12228212	.	0	+
V	12230347	12230716	.	0	+
V	12231508	12232211	.	0	+
V	12303355	12303781	.	0	+
V	12352951	12354098	.	0	+
V	12476829	12477481	.	0	+
V	12553012	12553715	.	0	+
V	13055373	13055760	.	0	+
V	13127784	13127970	.	0	+
V	13198873	13199129	.	0	+
V	13200569	13201151	.	0	+
V	13201384	13201913	.	0	+
V	14105996	14106301	.	0	+
V	14146619	14148506	.	0	+
V	14194644	14194938	.	0	+
V	14239989	14241135	.	0	+
V	14318929	14319685	.	0	+
V	14320560	14321459	.	0	+
V	14324797	14325774	.	0	+
V	14412811	14412991	.	0	+
V	14718594	14719061	.	0	+
V	14728425	14728882	.	0	+
V	14743597	14743793	.	0	+
V	14744363	14744670	.	0	+
V	14744714	14745164	.	0	+
V	14784785	14785647	.	0	+
V	15049738	15050025	.	0	+
V	15461543	15462099	.	0	+
V	15566906	15568424	.	0	+
V	15568692	15568964	.	0	+
V	15595360	15595490	.	0	+
V	15732601	15733499	.	0	+
V	16026734	16026900	.	0	+
V	16238038	16238669	.	0	+
V	16354967	16355316	.	0	+
V	16376517	16377021	.	0	+
V	16407071	16407540	.	0	+
V	16533179	16533996	.	0	+
V	16640480	16641707	.	0	+
V	16723854	16724619	.	0	+
V	16744565	16745655	.	0	+
V	16784505	16785095	.	0	+
V	16789680	16790401	.	0	+
V	16834601	16835141	.	0	+
V	16929025	16929536	.	0	+
V	16950903	16951307	.	0	+
V	16988365	16988856	.	0	+
V	17047421	17047848	.	0	+
V	17069467	17069783	.	0	+
V	17126728	17127788	.	0	+
V	17133271	17134231	.	0	+
V	17135661	17136208	.	0	+
V	17138599	17139199	.	0	+
V	17139746	17141823	.	0	+
V	17142402	17143147	.	0	+
V	17143313	17144299	.	0	+
V	17155999	17157243	.	0	+
V	17233041	17233872	.	0	+
V	17314115	17314328	.	0	+
V	17323690	17324411	.	0	+
V	17349042	17350002	.	0	+
V	17422916	17423858	.	0	+
V	17425105	17425622	.	0	+
V	17427223	17428160	.	0	+
V	17462077	17462472	.	0	+
V	17464572	17465691	.	0	+
V	17537536	17537767	.	0	+
V	17544345	17545810	.	0	+
V	17548497	17549201	.	0	+
V	17576951	17577000	.	0	+
V	17580111	17580904	.	0	+
V	17595468	17596767	.	0	+
V	17602207	17602726	.	0	+
V	17638433	17638912	.	0	+
V	17660628	17661153	.	0	+
V	17675275	17676292	.	0	+
V	17725429	17726623	.	0	+
V	17726768	17727690	.	0	+
V	17738372	17739912	.	0	+
V	17748917	17749614	.	0	+
V	17760698	17761635	.	0	+
V	17764291	17764686	.	0	+
V	17801952	17802443	.	0	+
V	17811766	17812681	.	0	+
V	17870379	17870611	.	0	+
V	17927441	17928557	.	0	+
V	17943570	17944419	.	0	+
V	17944608	17945189	.	0	+
V	18030553	18031294	.	0	+
V	18031598	18033204	.	0	+
V	18120489	18121386	.	0	+
V	18122569	18122969	.	0	+
V	18173366	18174245	.	0	+
V	18267556	18268163	.	0	+
V	18403082	18403801	.	0	+
V	18415668	18416849	.	0	+
V	18435989	18437614	.	0	+
V	18438709	18439917	.	0	+
V	18440000	18440462	.	0	+
V	18444036	18445372	.	0	+
V	18445624	18446173	.	0	+
V	18448209	18448990	.	0	+
V	18449898	18450987	.	0	+
V	18454019	18454843	.	0	+
V	18472111	18473011	.	0	+
V	18478983	18479972	.	0	+
V	18638671	18639518	.	0	+
V	18653195	18653830	.	0	+
V	18656284	18657584	.	0	+
V	18660131	18660947	.	0	+
V	18662926	18663375	.	0	+
V	18670374	18672266	.	0	+
V	18728784	18729133	.	0	+
V	18731288	18731607	.	0	+
V	18740448	18740864	.	0	+
V	18776286	18777000	.	0	+
V	18875385	18877034	.	0	+
V	19260887	19261140	.	0	+
V	19271075	19272305	.	0	+
V	19273659	19274481	.	0	+
V	19274786	19278309	.	0	+
V	19279565	19280082	.	0	+
V	19280875	19281553	.	0	+
V	19307828	19308713	.	0	+
V	19311120	19311594	.	0	+
V	19325201	19325947	.	0	+
V	19340016	19340972	.	0	+
V	19344174	19345943	.	0	+
V	19371259	19372442	.	0	+
V	19373701	19373778	.	0	+
V	19485124	19486166	.	0	+
V	19509291	19509818	.	0	+
V	19510851	19511476	.	0	+
V	19512191	19517099	.	0	+
V	19517192	19517938	.	0	+
V	19555329	19555991	.	0	+
V	19576422	19576985	.	0	+
V	19604982	19605986	.	0	+
V	19616273	19616674	.	0	+
V	19620942	19623665	.	0	+
V	19709258	19709963	.	0	+
V	19752681	19753439	.	0	+
V	19786958	19787571	.	0	+
V	19790101	19790918	.	0	+
V	19826963	19827575	.	0	+
V	19860022	19860793	.	0	+
V	19999249	20000322	.	0	+
V	20257904	20258471	.	0	+
V	20272222	20272881	.	0	+
V	20301695	20303171	.	0	+
V	20303353	20305645	.	0	+
V	20306882	20308602	.	0	+
V	20359986	20361147	.	0	+
V	20455685	20456467	.	0	+
V	20483209	20484524	.	0	+
V	20506947	20508265	.	0	+
V	20509417	20510340	.	0	+
V	20599951	20601411	.	0	+
V	20612179	20613114	.	0	+
V	20668277	20669250	.	0	+
V	20670618	20672612	.	0	+
V	20673010	20675340	.	0	+
V	20675680	20676735	.	0	+
V	20795033	20795422	.	0	+
X	43064	44838	.	0	+
X	67629	67882	.	0	+
X	68070	68260	.	0	+
X	86374	87052	.	0	+
X	144393	145178	.	0	+
X	151860	151972	.	0	+
X	160881	162088	.	0	+
X	173399	174000	.	0	+
X	217737	217894	.	0	+
X	319500	320387	.	0	+
X	340634	341121	.	0	+
X	1081877	1082519	.	0	+
X	1101854	1102434	.	0	+
X	1202611	1203239	.	0	+
X	1203391	1203980	.	0	+
X	1339724	1340990	.	0	+
X	1351813	1352530	.	0	+
X	1383514	1384256	.	0	+
X	1385876	1387490	.	0	+
X	1483865	1483999	.	0	+
X	1513169	1513555	.	0	+
X	1538381	1539574	.	0	+
X	1550198	1550397	.	0	+
X	1571323	1571492	.	0	+
X	1571560	1571762	.	0	+
X	1584544	1585033	.	0	+
X	1614449	1616504	.	0	+
X	1763283	1764240	.	0	+
X	1766658	1767017	.	0	+
X	1767180	1768091	.	0	+
X	1772136	1772910	.	0	+
X	1786584	1788351	.	0	+
X	1978317	1978872	.	0	+
X	2093797	2094543	.	0	+
X	2144699	2145392	.	0	+
X	2168138	2169423	.	0	+
X	2213364	2214179	.	0	+
X	2216355	2217587	.	0	+
X	2218855	2220027	.	0	+
X	2362745	2363842	.	0	+
X	2430284	2431142	.	0	+
X	2446201	2446852	.	0	+
X	2683025	2683324	.	0	+
X	2712178	2712974	.	0	+
X	2843247	2844252	.	0	+
X	2927875	2928307	.	0	+
X	2945885	2946588	.	0	+
X	3028694	3029623	.	0	+
X	3120031	3120347	.	0	+
X	3293518	3294023	.	0	+
X	3472075	3472818	.	0	+
X	3706212	3707029	.	0	+
X	3733358	3733582	.	0	+
X	3747282	3748796	.	0	+
X	3749472	3750287	.	0	+
X	3750705	3750961	.	0	+
X	3751135	3753180	.	0	+
X	3753931	3754463	.	0	+
X	3769587	3770144	.	0	+
X	3798523	3799634	.	0	+
X	3811651	3811847	.	0	+
X	3812128	3812453	.	0	+
X	3812479	3812699	.	0	+
X	3812725	3813116	.	0	+
X	3903845	3904658	.	0	+
X	4293329	4293407	.	0	+
X	4353985	4355016	.	0	+
X	4733258	4733914	.	0	+
X	4943947	4944385	.	0	+
X	4962334	4963841	.	0	+
X	4987634	4988042	.	0	+
X	5100785	5101685	.	0	+
X	5102216	5102815	.	0	+
X	5103196	5104744	.	0	+
X	5105821	5106945	.	0	+
X	5149573	5150398	.	0	+
X	5533731	5534524	.	0	+
X	5587749	5588459	.	0	+
X	5871745	5872353	.	0	+
X	5995219	5996191	.	0	+
X	6066310	6066972	.	0	+
X	6280194	6280549	.	0	+
X	6329689	6330402	.	0	+
X	6334695	6335403	.	0	+
X	6402593	6402943	.	0	+
X	6408731	6410695	.	0	+
X	6591813	6592109	.	0	+
X	6875259	6875909	.	0	+
X	7067428	7067465	.	0	+
X	7219598	7220223	.	0	+
X	7345680	7345985	.	0	+
X	7361602	7364159	.	0	+
X	7462615	7462993	.	0	+
X	7591493	7591993	.	0	+
X	7729074	7729678	.	0	+
X	7730544	7731631	.	0	+
X	7941853	7942729	.	0	+
X	7943732	7944401	.	0	+
X	8149766	8149839	.	0	+
X	8159375	8159912	.	0	+
X	8262314	8263122	.	0	+
X	8341827	8342967	.	0	+
X	8646754	8647745	.	0	+
X	8722638	8723900	.	0	+
X	8825232	8825829	.	0	+
X	8999704	9000386	.	0	+
X	9106798	9106932	.	0	+
X	9192828	9193824	.	0	+
X	9195056	9197317	.	0	+
X	9201477	9203342	.	0	+
X	9232961	9234791	.	0	+
X	9396288	9396707	.	0	+
X	9666695	9667176	.	0	+
X	10052235	10052543	.	0	+
X	10078149	10078540	.	0	+
X	10428857	10429597	.	0	+
X	10613959	10614436	.	0	+
X	10945791	10947665	.	0	+
X	11113736	11114822	.	0	+
X	11379370	11379735	.	0	+
X	11685329	11685685	.	0	+
X	11711250	11712100	.	0	+
X	11868397	11868778	.	0	+
X	12105411	12106623	.	0	+
X	12313629	12315322	.	0	+
X	12471247	12473705	.	0	+
X	12474443	12475219	.	0	+
X	12501258	12501735	.	0	+
X	12603671	12603764	.	0	+
X	12609050	12609767	.	0	+
X	12932552	12932910	.	0	+
X	12934585	12935707	.	0	+
X	13008365	13008875	.	0	+
X	13238054	13238479	.	0	+
X	13388588	13389337	.	0	+
X	13466918	13467719	.	0	+
X	13935658	13935937	.	0	+
X	14039322	14040049	.	0	+
X	14289581	14291456	.	0	+
X	14490478	14490932	.	0	+
X	14504047	14505161	.	0	+
X	14612429	14612520	.	0	+
X	14728799	14729336	.	0	+
X	14730976	14731681	.	0	+
X	14755113	14755499	.	0	+
X	14982355	14982913	.	0	+
X	15033852	15034608	.	0	+
X	15065954	15066199	.	0	+
X	15128824	15129392	.	0	+
X	15139849	15140703	.	0	+
X	15174814	15176305	.	0	+
X	15193676	15194161	.	0	+
X	15259721	15260694	.	0	+
X	15362085	15362861	.	0	+
X	15368405	15368892	.	0	+
X	15409900	15410341	.	0	+
X	15485044	15485744	.	0	+
X	15521106	15522212	.	0	+
X	15577850	15578125	.	0	+
X	15650299	15651052	.	0	+
X	15981744	15982618	.	0	+
X	16044307	16045603	.	0	+
X	16133697	16134224	.	0	+
X	16144542	16145022	.	0	+
X	16204511	16204561	.	0	+
X	16381297	16381625	.	0	+
X	16382890	16386002	.	0	+
X	16391680	16392762	.	0	+
X	16399939	16400114	.	0	+
X	16405749	16406501	.	0	+
X	16414585	16415649	.	0	+
X	16457080	16457545	.	0	+
X	16488760	16488996	.	0	+
X	16602507	16602695	.	0	+
X	16626905	16627518	.	0	+
X	16640455	16641458	.	0	+
X	16651949	16654846	.	0	+
X	16655157	16655770	.	0	+
X	16769657	16770238	.	0	+
X	16818836	16819262	.	0	+
X	16827868	16829927	.	0	+
X	16830274	16831947	.	0	+
X	16832359	16832736	.	0	+
X	16832742	16836561	.	0	+
X	16837281	16838302	.	0	+
X	17117504	17117863	.	0	+
X	17125254	17126647	.	0	+
X	17127369	17128058	.	0	+
X	17282866	17283656	.	0	+
X	17369251	17369901	.	0	+
X	17420329	17421931	.	0	+
X	17456521	17457302	.	0	+
X	17513077	17514372	.	0	+
X	17519357	17520171	.	0	+
X	17578559	17579094	.	0	+
X	17639326	17639852	.	0	+
X	17645818	17646763	.	0	+
X	17647833	17649427	.	0	+
X	17667264	17667640	.	0	+
X	17673495	17676424	.	0	+
X	17706133	17706761	.	0	+
X	17707333	17707732	.	0	+
